# Supplementary material
Source: PubMed Central journal article supplement (PMC4875358)
Supplement: 13238_2012_2914_MOESM1_ESM.pdf [file 13238_2012_2914_MOESM1_ESM.pdf]

Table S1 TMHMM results of the 32 proteins from filter by cross-blast.

| ID                 | Len  | ExpAA | First60 | PredHel | Topology        |
|--------------------|------|-------|---------|---------|-----------------|
| <b>Ame_R000248</b> | 257  | 0.4   | 0       | 0       | o               |
| <b>Ame_R000307</b> | 391  | 0.24  | 0.06    | 0       | o               |
| <b>Ame_R000609</b> | 854  | 0.19  | 0       | 0       | o               |
| <b>Ame_R000622</b> | 443  | 0.64  | 0       | 0       | o               |
| <b>Ame_R002839</b> | 221  | 0     | 0       | 0       | o               |
| <b>Ame_R002945</b> | 92   | 0.43  | 0.43    | 0       | o               |
| <b>Ame_R004369</b> | 163  | 40.54 | 19.46   | 2       | o10-27i124-143o |
| <b>Ame_R005446</b> | 671  | 0.02  | 0       | 0       | o               |
| <b>Ame_R006110</b> | 359  | 21.2  | 21.2    | 1       | i7-26o          |
| <b>Ame_R006158</b> | 325  | 0.55  | 0.14    | 0       | o               |
| <b>Ame_R007364</b> | 146  | 0.48  | 0.03    | 0       | o               |
| <b>Ame_R008064</b> | 2012 | 0.63  | 0       | 0       | o               |
| <b>Ame_R008184</b> | 335  | 1.39  | 0       | 0       | o               |
| <b>Ame_R008820</b> | 284  | 0     | 0       | 0       | o               |
| <b>Ame_R008980</b> | 148  | 0     | 0       | 0       | o               |
| <b>Ame_R011061</b> | 397  | 0.03  | 0       | 0       | o               |
| <b>Ame_R011984</b> | 366  | 0.02  | 0       | 0       | o               |
| <b>Ame_R012522</b> | 460  | 0.06  | 0.06    | 0       | o               |
| <b>Ame_R013038</b> | 320  | 0.02  | 0.02    | 0       | o               |
| <b>Ame_R013090</b> | 1014 | 0.15  | 0       | 0       | o               |
| <b>Ame_R013224</b> | 377  | 0     | 0       | 0       | o               |
| <b>Ame_R013532</b> | 306  | 13.16 | 13.15   | 0       | o               |
| <b>Ame_R013753</b> | 374  | 0.67  | 0       | 0       | o               |
| <b>Ame_R014240</b> | 517  | 0.72  | 0       | 0       | o               |
| <b>Ame_R015262</b> | 250  | 0.05  | 0       | 0       | o               |
| <b>Ame_R017002</b> | 85   | 0.02  | 0.02    | 0       | i               |

|                    |     |       |      |   |   |
|--------------------|-----|-------|------|---|---|
| <b>Ame_R017525</b> | 86  | 0     | 0    | 0 | o |
| <b>Ame_R017570</b> | 893 | 12.92 | 0    | 0 | o |
| <b>Ame_R017671</b> | 332 | 0     | 0    | 0 | o |
| <b>Ame_R018563</b> | 17  | 0     | 0    | 0 | o |
| <b>Ame_R019548</b> | 176 | 0.03  | 0.02 | 0 | o |
| <b>Ame_R020040</b> | 235 | 3.14  | 0.04 | 0 | o |

### DNA Sequences

>Ame\_R000248

ATGTTTGTGGCCATACTGTGGACCATGGAGGGGTATTCCACGAGGCCCA  
TAGTTACAGGGGGGACATCAAACCCTGACCATGCAAATGATCTGGGTAG  
GCACCCAACTTTTGGCCCCTGAGGTACATGAGTTCATGCGGGAAAAAATC  
TCTGCTTGGGCTGTGCAGACTAATGATATGGGTGTGGACAACATTGAGGA  
CTTCTTATCCCTGACCCATCTGCAGACAAGACATGATTTGATTTCTAAGA  
AATGTCACCGGAAAAAAACCGGAGTCATTCTTAGGGCATATATTTCTCA  
TGGTTCTTGGGGAAGTGTAGGTCTGGCTGTGTTGGAAGAAAGTGTACCAG  
TTTGCAGCAAATTGGCCCTGTGAGAGCAAGCCCAGACAGAGCCTGGTCTG  
AGGAAGCCACTGAATTTTTGGCTGAAAAGTGGCACACTCTGACTGGATAC  
TCAGTGAAAATCCTTTTAGTCATAAAATGGAGCATCCAACACTACTGTGGC  
CTCACATACACAACAGTTAGCAAACAGAACTATTTCCCATTGGAAATGA  
CTGAAGGAGCTTTACCTTCGTGCTCTTCTTCTCCTCCCCAGTCAAACGT  
CTCCCCGTGGATGAACAATCCGGCACTGTGAGTGCTCTGCCGGTGTCTCT  
GGGCGTCAGCTGGCCTCTGTTTATTATTGGTGAAAGTTTTCATGAGTTTG  
AAAACAATGTAACAACTATTCTGCTAATGTGACCGTATTGATTGCCTAT  
ATTGGATTGAAAGGTCCAGATTAG

>Ame\_R000307

ATGAGCACTGAAGCTATAATCAGTATCACTGTTCTCTCTACTGCCATCCA  
GGGAGAGAGAAACTCCAAGCTGTGGGGCCAAGAAGGGGGTCTTAGAGTCT  
TTGCAAAGCTGGGGATAGCTGTTGGGGGAGTAGCCACAGCAGCTGACCCT  
GACAGTGAAGGCACGTTACAAACCACGTGGCTCTCCTTGCCCACTGCT  
AATCTGGAAGGTGAAAGCTCTTCAGGCTCGGGACCCAGTGAGGACAGGAT  
GCCTGCAGCTGTACCTGGGACATCAGAGGAAAGAGCATGCGGCCATGACT  
CAGGGGTGCAAACCACACTGCTCAGCCAAGCACAGGGACGTTGTAAGGAC  
AAAGCAAGGAAGAGAGGTGAAAAAGGCTCTGAAAACACCCAGTGCTATG  
CACAGCAAGATGGTGGTGGCAGTAATGATGCTGATGGTGAAGAGGAAGAG  
GACGAAAAATTTAAACAGAAGGCTCAGAGAGGCAGAAATGATGAGGAGAT  
GGCAGAGAATGGTATCAGTGAAGTAGGCCTTGGATTATCTGCTGAAGGCC  
TCCCCTACTCGCACCCACAGAGGAAGCTCTGTGAAACACCCACAGCAGGG  
CAGGAGGTAGGAAAGGTAGTTAGTTACCTGTTGGAGTCCTTCAATGTGGT  
AAAACCTATGAAAGGGCATGCAGAGACTAGTTTGCCTTTAGAGGCTGGCG  
GTAAAACCTGAGAGGCAATTGGGGCCTTACGAAAAGTCCTCAGAGCACTTA  
GAAAATTCAGATTTATCCTCAAAGAGACTTGACAAAAGAAGTTGTCAGG  
GCCTTCAAAGCCAAAAAAGGTGGCTCCGCAGCCATGGCGACCTGTTGCA  
GACAGGAGTCAATGGAGCCCAGTCATCTGCGGCTGTTCTCCTAATAGGG  
AAGGCATCGTGTTACCTTTGATACCTGTGTCTATCACAGTGTCTGGTAC  
ACTGCGGGAACCTGATTTGTTTCATGAGGGATTCATTTTGGATTCTTCCC  
ATGTCCTAAGGGGGAACATTAGAAGGACCAGTTGTACACGCGTAGATGCC  
ACTCTGTGTCTTGCCTCCCCGTGGTGGGAAAAAGGAGGCAGGAGGCACCT  
GGTATGGTCAAGGCGACGAGCTACCGGGCTGCATGTGCATGAAGCAAGCA  
AGTACGGTCCCCTGGTGGTGGCTGA

>Ame\_R000609

ATGCAGTTGAGGCGAGCCTTGGGCTGCTTAGAGGCGCTGACATCCGAGGA  
GCCTTTTCCTGGCGTGAGAGCCAGTGATGTGCAAGCAGAACTCAAGGCT  
CGGCGCCTTTTCTGCTACTCATCCCACAGAAGGAACACAATGCTAAAGAA  
AAGAGCCATGCTTCCCAAACCTCCGGCACCGTGGGTGACAAGAACTCCCT  
GAAAAGGCTAGGTTTGAGCCAAAGGTGCCAGGGAGAGAGGATCCCAGCAG  
AAAGGTCAGTATGGGGAGATATGCTGTTCTGCATGATCGATGCCTCCCAT  
GTCCTTGAGAGCCAAGCCGAGAGGGTACCAGCAGGTCTGGATGCCATGGG  
TGTCTGTGGGAGACAAAGGCAAATTTTCCAGGAAAGGCTAGGGGGGAGGA  
AGGCTCTCTCAAAGCGATCGGCAGGGCAGTTCAGAGGGCTGTACCGATGC  
GGGGTGCCAGGAGGGACACACAACCTGGAAGAGGGAGATCCAACAGCCGA  
AGTGAGCCCACCCGGCTCAGGGGAAGACCTGACGGGTGCTAAGGCCACCC  
TGGAAGCCAGTCTTGAAGAGATCGAGTGGGCAAGGCTATGACATTGGC  
CCTGCAGTGTTTGGAGATGGCCACCCGGAGAGGAGAAGGCTGGCGCCCCG  
CGCCAGCCTTGCAAGCGGAAACGGCTAACGAGGCGATTTGCTCAGCAA  
GCAGACCAAGCTTTTGAAGGCTTCGTTTGATTTGGCCCTAAATGGGTCT  
TGGGCTGCTGACACGCATTCGATCAACTTTAAAGGAATGCGCATAAATCA  
GGAAGCCCCTAGCGTCTCTCCCGCAGAGGTCCGCAAATCCGGAAGGGCGC  
CTCTGAACCCACCAGGTCTGGGGTTTAGCAATCCGGGACAGCCTTCGTCT  
CCGCTTGAATCCGGAATTCGTATCCGCGAGTCTTCTGCAGGGGGACCC  
TGCGGTGGACACTAGCGCTTTCGGCTTCGAGAGCGTCAAGATTTGGCTCC  
TTCCAGGGGAACCCTGGAGGGGCATTTACGGATGCGCCTGGCTCATGGTT  
CCCGGGACGTTCCACTGGGAAACTCGGACTGTATTTAGGAGCTCTCTCCA  
TTTTCTGTCTACAGTGTGGCGGGCAATTTCAAACACTTGCACTTAGGC  
CCATAGGGTGTCAGAACGACCCCTCACACCCACACTGACACGCACACAC

ATTCAAGTGTACTCTGATCACCCACACTTAGATTGGGGAGAGCATTGTGT  
CCAGCCTGCAGAGGGTGCCCGTCTCCTCTGTCCAAGAACCAGCTGGAG  
AAGCCTTTCTTTGTATCTGGGAAATGCAGACCCTTCTGAGAATACGG  
TGGGGTGTGGTGCTGGAAGAGCCAAGCAGCCACCAGGTTTTGCCAGACC  
CAGAAAAACGAAAACACAGCACAGGGAGCCCCACCAGCCGGCGCCTGTG  
CCAGCTCACCTCTGGCCATGGTGCAGCTGCTGGTGCACACAGCGGCCAAG  
GCCAGCTCCACATTCTCCCTCCCTCTCCCCACTTCACCGGAGACCGAGC  
CCTGCATGCAGAGGAAGGGCCCCAGCTCCACGGACTGCCAAAGTCGACTG  
GGTCCCTCCTACCAAAAATGTAGGGTGGGGGGCACAGAGATAATGGCA  
AAGGAAGAAAGATCCGAAGGGGGGGGAATGGCTGAGGAGCTGAGGCTGGC  
TAAGAGAGAAAGAGAAAGAGAACAGGAAAAACCCCAAACCAAATTGCAT  
CTCAGAATCTGTGGTTGACCAGACCCTTCAGGAAAGAGAGAAGTGGGACT  
GCACTGTTTATGGTGGGCTTTGATGCTTCCCGACCCGCCTCCCCACCAGG  
GCAGAAGCTTAAGGAGGAAGGGAAACCAGCTCCGGGCTGTGGATTCATTA  
TGTCACAAACGCACTGAAGACATTCGAGCGTTTGAAGGAAACAGGGGTT  
TGGGACGTACGCCTGGCCCCGCGGAGCCCCGGGTTTCTCGCGGAGAACT  
GGCGCAGGCAGTCAGGCGGCCACGCGGCCTGGGCCCGCGGAAGTCCGTCTG  
CTGCTCTGAACCCTAAAGCCTCCTACGTCCCCGACCCGGGCTGCGAATTC  
TTAACGCACAGAGCAAGCGAGGGGAGGAAACTCACCAGCGCAGCCACCAG  
CTTGGGGAACAGAGCAGAGAACGCAGAGATTCGCACATCAAATGCACGCA  
CGCACATGGTGAACGCGGACAGCCAACGTCATGGGGGTGAAATACACGCA  
TACCAAGTCCCAGGAAAACCTTTCTCCTGCTGGACCAGCTTGGCGAC  
ATACTTTGGGGTAGCTGGCGTCTCCCTACCCGTTCCGATTTTCCAGATCA  
CTCTCTCCACTCTCTCCATTCCCTCCCCGTGGCTTTCAGTAAATACACCT  
GTCCCCAGTGGAAGGCGAGTCCCTGGCTGGCATTACCTGGTTTCGGGTGC

TCTCCCCAGAAGCTCTGGCTGGCTCTGGGGACCCGCGCGGAGCCCCCGGG  
AGCGCCGACGCTGCTCGTGGAGCAGCTGCCGCTCCTTTGTCCCGCTGCTC  
CAGCTCCCCGCTTAG  
>Ame\_R000622  
ATGAGGTCTTTGTTGAGGACGGCTGCGGGATCATCTGCAGCACAGGCGAC  
CGCACTCGGCAGCGCAGATGATGCTTGGGAAGCCCCGACCGCTTGCGGA  
AGGTCGTTGCTGTCTGTGCACGGTCTCCGGAGTTGGCAGAGAAGACAC  
GGGGGAGCAGTGGGCTGTATGTTGCAGAGCTTGTGGAAGATTCCCCTCAC  
AGGGGAAGAAAAACACTTAGATGGTGCTTTAAGGCAAATAATGGAGCTGA  
TACAACGAGTCACAAAGCAGTGGGGTGGCAGGAAGATAATGTCTTTGAAA  
ATATTAATAGATTTAGAATGCTCTTTTACATTGGTTGATGATATTTACAG  
TTACCAGAGTCTCTTGGTTTATTTGACAAGGAGGACTGTTACCGACCTGC  
TCATCTGTGTAATGGAAATTCCAGCAGGGCTCTCGGGACATCTTCGGCGC  
GTTTGTTTACACACTTGTCTGCTTACACCAAAGGAAGACGAGTTATCCAC  
CAATTTGGAAGCGGTATTACAGTGAATGATACGGAGAACGACTACAACC  
CGCACGTACAGACCGTCTGCGCACGCTGCTGCCTGCCCGGACCCATCAG  
GACGCGGAGCTACCTTCTGTGCTGTCAGTTGTAAGTACATCAAACCTCAA  
GGGCCAGAAGGCAGGGGGCACCTGGCGCCAAGGCAAGGGCAGCCCCCTCCA  
CTCTCAGAGTTTCCAGGTTACAGTTGTGTACTTTTTTGAACCTCACACCG  
TTGAAAAATATCAAGATGCAAACCGGAGAATGTCTGCATGATGAAACGGG  
GTCAGAGTCAGTGCTCCGGCAGGGGGACACGAGAGTGAGAAAAGTACCA  
CCGGAGGAAGGACTCACGTTCCAAGAACCTGCCCTTCCACGTGGAATCA  
CTATGCTTTCCACGACGTGCGAAAAATCCCAAGAAAAAGCTGCCTCTTCT  
TCCCGGGCTTTGCATTCCCCGGCTTACTAACTGTCTGGAATTCCTGATC  
TCATTATAAGACAGCGACACGAAAGCATTAAAGTCCTCACGCCAGCACAC

CCCAAGTGTGCGGACTACAGTCTCACTCACCTTGTAAGCCCATCCTTC  
TCCCGTGAAGCCTTTCCTGATCTCACAAAAGGAAATTATTTTTCAGGCC  
TTTCGACGTATGGCGTGCGGCTTATGACGTACCACATTCTGCCCTGGGTG  
TTCGCTCACACGCTGGAAATGCAGTCTTGGGCCACAAGGGGCGCTGTCGT  
TGAGTTCGCATGGATGCCTCCCCTGAAGAGAAGAATTGAAGGGGCTCGGG  
ATGGTAAAGTGTCTGTAGACAATCTGAAATGA

>Ame\_R002839

ATGCTCCCACCGCGCAGCCCCAAGCGGGCACCCCCGAACAAGCACCCAG  
GCGGGCACCCCGGATACCTTGC GGCGGGCGGGCGGGCGCCGCATCTCCG  
CGCTTCTCGGCCCGAGAGGGACTCGAAAGTATGTAGGAGAAAAGTTTCCC  
CTCCCACATGGGGGGGAGGATGTCGGGGGAGAGAGGGCGGAAGATGGAGA  
GCAGCGCTGGGAAGATGTTTCTGGCCGGCGGAGCAAAACAGCTGAGGAAG  
TGGGGGCTGTCAAGGAAAATGATGATCAACAGTGTTCAAATACAAAGATA  
TCCAGGCAAAGGGCCCCAAAGGAGTGAGGTCTGAGAAGAGTCGAGTGCC  
TTCTCGCTACCTGAAATCTGAAGGCATCCGTCAGAGGCAGCTCGACAAGG  
CCACGTGGCTGTTGTGGGGAAGCGCCACCAGTGTCTGCGATGTCATCAGG  
AGGCGTGGCGTTGGTACGGATTCCCAGAGCCCTGCCAAGCTCTCCAGTTG  
TCTGGTGGCAGGCCGTTTCGGGAGGAAAAGAAAGCAGGGAAAGAGGGAAAA  
GCACCTACAGGGCCAGCAGGCTAGGGCACAAACCCACCTGGATGGACAGC  
TTCCCAGCCTGCATGTCCCCGGGAGCCCTATCATCTGCCCTGGGCCTTT  
CCCTCGGCTCAAGTAG

>Ame\_R002945

ATGTGCCATGTTATTTACATTCCACTTTTTGCAACGCCGGTGGATACTGT  
GGATTTAGGATATGCAAGATTCACGTATCAGCGTATTTATAGTTCTGATA  
TCTGGACAGAAGAAGCAAGAAATGGAGGTGGTTCTCAGAAAACCTCAGGAT

AGATATGCCCTATCGGTATCAAGAATCCCATTCTTTCTTTTGTGGAGCT  
TAACTGTGTTTTAGGTATTGAAAGGGAGACCTCCACGTAGAAGAGTCCC  
CACGAGCATTAGCAAAGTTTGGGGCATGA  
>Ame\_R005446  
ATGTGGCTCTCAGCAGCCAGCCACCTGCAGCCTCCGGGAAAGGCCCCGGC  
TGCACCTGTGTTTATTCTCGCCCTGAACGCCGGCAAAGGCAGCAATGTGT  
CCTCCTCCCTACAGGTTTCTACCCTGGATTCCTCCTGGATAGTAACGAA  
CAAGCTGATAAACCTGGTGACCTCGCTCCACGCCAGCCATTCCCCCTCT  
CTCTCACTTCCCTGAGGAACTGGGATAGGAACCGGGTCACTGTGGGCG  
GCCCTGTGAACTTGGAGCCCGACGTGGCTTCTGGGAGTCAGTCACTGAGG  
AGTGAAGTGAGGAGGAAGCGCAGGGGGAGAGGCGGGAGTGTGGAGCGGGA  
GCTAAGAGGGCAGGAGGCCCGGGAGGGGCTTGAGGCGTCCCGGCAAGCAG  
CGGCTCCCGCCACCCCAGGGAGGCCGAGGGGGCTGCCGGCACAGGACCC  
TGCGCCCTCCCTCCGCGACGTGGCCGGAGGTGGACGCGGTGCCTTCAA  
GAATTTGTCTGCAGGAGAGCAAAACAAACACAGCTGTAGTGAAGATAAGG  
GCTTTTCTAACACTTGCAAACCTGCTGGAGATAAGAAAGCTTCTGGGTTT  
GCTCCCCTGCGAGTCCCGCTGCCCTTACGCACCTTAGTTCTGCGTCTAGG  
CACGCCGCCGGTGGTCACATCCTACCCAGGCCTATATGAACCGAGCTACT  
CTGCTCAGCCAGCGGCCGTGGGCACGGTCAGTACTTCTTGGGCAGAAAA  
AGGCCTACTGAGGAGAGTTACACGTGGTATTTTGTCTTGGACAAGAGAAT  
GGACGACGATGTGAGGGAAGACACTGAGCCACTGAGGAACCCAGGGCACC  
AAAAGGCAATGTTAGTCTTTGACGAGGAAGCTGCGATGTGTCTCTGTTCCG  
AGCAATGCCATCAGTAGGAGAGCTGACACCACGCAGGCTCTCTTCTTCT  
CCCAACAGGGTGGACGGAGAAGGGGGTGCTGATTAAACACACTCCCCCTG  
AGAAGGGGAAGGGGGAGTACCCCCCTGTACAGCCCCAACATACCCACTT



TCTCCTCCATCTGTCCCACTGACCCTGGGAGAGAAATACTCCTATTGGAC  
AGCGGGGAAGGGGCACCTTGAGGAGACAGGGCAAGGGCAGGCTCTTACCA  
GCTTTGACCCAAAGACATGTATCAAATTAACCGAGCACACGGTGGTCTT  
ATTGCAGGCTTTGTTGTCAACACAGGTGTAGCAGAAATACAGCTAACGTG  
TTCATTCGGTGTGCAGAGGAAGGCTCCCCTGCATCTCCCTCCGAGCCTGG  
GCAGCAGCCAAGGAAGCGTCTCCCCTGGGTGCTCGTGCTCCGGACGGACC  
CTGACTCTCTGTGGAAGGGCTGGGGACCTGTCACAGTACAGCTGCTGGCC  
CCAAACCCAAGCCTTCTCCGTAAACAGATGCCGACTGCTGGCGATCGGGC  
ATAACCAGGCGATTCCAATCACAGGAAATACACCAGGCAGAACAGAGACG  
ATCGCGTCGTGCCGCCACAGGGAATCTGGAAGAAAGGAACACAGAAGGTC  
GTCATGCACCAACAAAGGACTGCTGGTTATTTCAGAAGCCAACAGGTGGA  
AGGCCATGGGGAAGGAGTTAGTGGAGCAAGAAATGGCCTGGGGTGCCATG  
AACCCAGGTACTCTCCTGGTCCCTCCTCTTGCCCCAGACCTCAGGTTAC  
TGAAGAAATGCTACCCATCCTGAGCCTCCAGCGGGCACTTGAAAATGATG  
CCCATAAGCAAGTGTACATCGGAGGGTGGCTGAGAAATAAGAGCCGGCAT  
GACTCCTCCAATCCACCCAAGCCCAACGCTTCCGTGCGAGATGCCTCCAG  
AGGCCTCGACACTCTCTTTCCCAAACATACAGCCGACGGTGACGGTGAAA  
TTAACGACTGGAAACAGACCAAAGTCGCTGTGAATAAGGTCCACAGAATA  
AAGATGGGTGAGTCTATTGGAAAACGTCATTTTGGAGTTGTA AACGCAC  
TCGAAGCCAGCCTTAG

>Ame\_R006158

ATGGCGGTGGTTCTGGAACGAAATTCTCACCTTATCCCCTGCCTCATGG  
GGCCACCACGCCGATCCAGACACCGAACGCGTCCAACACAGCCTATCTTC  
TGCCTCCAGCAGTCCGGGCAGAGTCCCAGCCCAAGGGGCGGAAGGAAGCC  
AACACTATGGGCAGACTGTGGCTCACTGGTGTGCTCACCTGCTGCGCTTA

TTGTGGGCTTGAGGGAGCTGAAGTTGGGGGGTGGGAGCTCTCACCTGACG  
AGCTCTGCAAGACAGAGAGCCCCCTGTGGGCAGCCTACCTCAACGCCAGA  
CGGTTCTGGGCAAATCTGCTGTATATCGCACTGCTGTCACATCCCTAGA  
CCACCCCATCCCCTTGGCACCAACCCCACTGGCCTTCCCTCTGGGAGGAA  
AGGAGACATTTGATTCATCTTTACATGAAGTTTTCAAGTATCCGAAGCCC  
ATGACTCGCTCTTTAATGCACATGCGGAACATCGAAGTCCGTCTTCATAA  
CCCGTATACCTTTGCCCGATGCCTGAAACAAATACTTGCTGGACCAAAAA  
TGTGTTCTTCGTGCTTGTCCCCTTGCTTCGTGTCGTACAACCCTGCGCAC  
TTAGCCATGACCAGCGGTGCAACAGCTCTAGGGAAAGCCACCGAGAGCTG  
GCCTCACGGCCAGGCGCGCGTGCTTGCTGGTTATTTCTCAATCCTCTTC  
ATACTGATACGCCTAGATCCCAAACTTGGGCGTCGTAGACTTCCTCCCA  
CTCTCCAGGGTCCAAATCCGTGTTCTGAGCACGGGCATGCAGATTCGAA  
TATCATTTTAACAGCCCAAATGAAACTGGAACCCAAACAGGAACGACCT  
CACTCATCATTGGGGTCGATGCCTGCGGAACACCTCCCACGTACCAGGTG  
CTGCTGGGCGCTGGGAACACACGACCACGGGTCTGTGAACACGCGGATGC  
TGAAGCTTCTCAGCGCATCACCGTGTGA

>Ame\_R007364

ATGGAAATTCCTGTTAAGCTTTCAATTTAAACCCTGTGCTTTACTTCAA  
CATGCTGTTTGATAGCAGTTGTGTTTCTGAGGCAGACCCTTCCATTATG  
CGAGTCTTCTCAGGCACTCACAACAGAAAGAAGCTATTACTGGAAATAGA  
GTATTTGTAGAAGTTGGTGTACAGGAAAGATGGATGCTGCTTTGCGACCC  
TCGTTCAAAAACCGAGTCCCCAGTGGTGTCTGTGTGGGAGTTCTGTGCT  
CCAGCGCCCTGTTCTGAAGGAGTCGGTGGGATTGCCAGGGAGTTTGTCCAC  
AAAGATGGCTACAGCGTGGGAAGACAGCTATTGCTCTCAAAATCCAGAAA  
AACCACAGCCAAACGGATGACAGTGCTGATCATGGCAGCATTTCCCTTGT

CGGACATACAGTTGTCACCAAGGCAGACAATCACTGCTTAA

>Ame\_R008064

ATGGGAACCATCCGATTTACCTGGAGAGAGCAGTCACTTTACAGAGATAG  
GCGACAAGGGGGAGAAGTCAGAGGGGAGCAGATGCCTGATGCACGGCTCA  
GTGTGGAGTTGAGCAAGGGCAGGGGTCACGGCTCCTTCTGGGCCTCGTG  
ATCTTACCACGTTCCACGAGGCCAAGACAAACAGGCTGTGTGCGGATCTA  
TTTCGGTCACACAGCTGCAAACACAGGATTTATGAAGCTGTTTGGTGCTC  
GGCTCCCAGGAGGCTGGTGCGCCAAGCTGCTGCTCTCCCAACTGTCTCGC  
CGTCCCTCCCCGTTCTGTTGAGCCTGCGGGGTCAGTACAGCGGCTCGCA  
CGGCCTCCCAGTTTCGGCTTCCGCTGCGCCCCTAACTCCTCACAGGGCCC  
TGACCACCGACCGCGGGATCACGTGATGTGCGGTCAGTACATTACCCAG  
AAACAGGAGGGGCAGCCCACAGACCCTGCCAGCAGGTGCCTGACCCAGA  
GGAAGCTCTCAATGTCATGTTTCCATCAGACTGGCAACTCCTTCTCGCT  
TCCCTATTTCTATCCACAGGGGCCACTCCACACAGCAGGTTCTCCCCAGC  
GACGCCCCCCCCACCGCCACGTAGCCCGTTTCGGCCAGTTTTGCATCCACA  
TTTACAGTCCACTCCTTCGCACACCTGGCTGGCCCTCTCAGGAAAAGAG  
GCTTACCGGCTCTAAAGCAACCAAAATGCACAGCCCACTCCGCACTAGAA  
GCCAGAGCAGTTCTGAAGCTCTCAGTACCACCAGACCCATCTGCTTTTG  
TGCCAGTCTGACACCCAGCCGGACGACGGAGGCTAATGGGGACAGGAAAC  
TAGAAACCTCAGGAGCCCACCGATTCCAGCTTATCTGCACAGCAGACCTC  
CAAAATAGTGATAATCCAGAAGTATCTAGAAGGCATCTCACGGCTACTTT  
TAACATTTATTCTTTCACTTTATTAGTCACTTCAAAGACACTTAATAG  
CCAAAGCAGAGATGAAAGGCAGTTGGAATTCCTTGAGCAGGTTGGACAGG  
ACCGACAGCAAAGCAGCAAAGGTGCCCGCTCCTGAAGAGGATAGGGCTCC  
CCTGGCTGCTGCCAGCACAATGGCCCAGTGCCGGTGGGTGGGAGGGGGCG

CTCCAAGAGACCTACCTTGCAGAAGGGCTCCATTTCTTGAAGAAGGTA  
CTGCCCCGCCAGATGGGTGGACCCGATGTGCTGCAACAGAAGAGAAACCA  
GAGTAAGCGTGGGCTGGTGGACTCACCCGGCTGCACTTGGAACAGACACC  
TCTCAAACGCACTGCTCAGAAGGCCTCAAAACACTTTCCAATGACGCA  
TTGTGGACACCCTCCGAAAATGCGTCTTTAAAAACCACCAGAGAGAGAGA  
GAGAACCCTGCGCAGATCCAAAGTGGCAAGTACAGCTGCCACAGTGATC  
TTCCAGGGCCTGGTGGAAACATACCAGAAATGGCCATTCTTGAGAAGGCA  
TACTGAAACATTTAGACAAAAAGGATCCAGGACCACAAAAGCCACAGCA  
GAGAGCATGGCAAGATCGCCCTGAGAGCAAACACGGACCATGCCAAGTA  
TGAAAACGAGAGACTCATCAAATGGATGACCCATCACCTACGAAACGT  
TCTTGGGTGCCCATCACTGCCAAGGCCCTGCAGGTGCTGGGGGCTGAAAG  
GGGTGTGAGACCTGCTGTGAGAACCGGATGGAGGCAGGTCGCTGTTCTGC  
AAAGAGTTTATGGAATGATGGAAAATCTGGCTTTTCCAATTCCGCGTCTC  
CAGCTCACCTTGTCTGTAGACTCTGGAATGTACCTCTGGCTGTGTCCTGA  
CATGACCCTCGGCTGTCACCCCAACAATCCCAGCTGTGGGAGCTGGACT  
ACCTGCTCATATCCAGTACCTCCTCAGAACTGCTGTTGGCTGAGGGCCCC  
AAGAGGCCTGTGGGTCACACGAGTGTCTCCAGGCACTGGCAGAAGCAGA  
GGACGGCCACAGGCATTTCTCAGAGAGAGAAGGGGTGCGAAGGGGGCCC  
ACGTGGACCAGCGAGCAGAGTGTCTAATCCACTCACTGTGCCACCCTGG  
ACGACCGTCTGGAGGAGAACAGCAGAGACAGCTGGCAACGACACCCTGT  
TTTCAATTTCTGGCAGGACCCTCAACTCCGTGACCTCCGCCGGGTTCTGG  
AGGAAGATCAGGTGAGAGAGTGGACAGAGAACAGAGGCAGGAAAACCAGA  
CAGGAAGCTGTTGGGGAGAGTCCAAGGAGCGGCAGGGAGAGCCAAGACCG  
TGACACTGGCAAGGGCTATAGGAAGGACAGACTCAAGAGACACTTCGAAG  
GGAAAATCAATAGGATTTGGTACCTGAATCAAGAGACAAATCAAAGACCG

TTTCTGACTTTGGATACTGGGCTGAAGGGAAAAAACTGCCAACACAGA  
AAAATTCAAGTGGGAGAGCAGGTTTAGAAGTGAGTGCGCTAATCCCCTGC  
TGTCATCCCAGAATTGGACCCAGGCATCAGCAGTGGAAGCATCCAACGTG  
GAAAAGACGGTAAAGCATGAAGAGAACTGTTACGTCTGGCTACAAAACCCG  
ACCACAGATGGCAAAGGGCAATGCTGGCTTGATTCTCGCTCTGCCCCAGC  
CAGACCTGCAGGGTTTCAATGAAGGATCTTACAGGTGGTTTAATAACAATC  
ACAGCTCTAGGAGATGATTACAATCTTGTAAAGAGAAATGGCACACGAACA  
CACAGGACCACAATATAAGGCAATATCTGCCAAGTATCATCCAGGCAGCG  
AAAGAGAACAGGCGTACCCAGGCGCTACTGATGCAGACCTCATCAGTTTC  
AGCTTGCTGGATCCTGTTTCAGTCCATAACCGTGCAGGACCAACTACGGGA  
GAGTCCCAGATACTCATCATAACGCAAATCCCCAGTAGACACTACTC  
GAAATCCTAACACCCATCATGGAACCAGCCCATTGCGCAGAAATTGCTCT  
GCATTGGGAGTTTCAAAAACCTGCCAGCTCCAAAGAAGAAACACACATCC  
ATTCTCCACCATCCAGCTGCCCTCACACTCATTTCTGGTTCACCCTGACT  
CTTCAGATTCTCATATCCAAACATGTGAAGCAAGAGCAAAGAATGGAGAC  
AGCGGGAATCACTATAACCAACTTGCTGTCACGGCTGCTGCGTCCAACAG  
TCCACCTGCAGGACCAGCGGGGTCCGCTCCACAGCAAGTGCGGGGAGGC  
AGAAGGCTGGGCAGGGGGCTGAGGGCCTGCGGAACTCACTAGGCCAGCCA  
GAACACCCCTTCCGATTATACATGCCAGCTCTCCCAACCAGCCTGAC  
TGCTTCCGCATCATCTCAAAGTGTCTCCCATCTGGACAGAACTCCCC  
AGGGAGGTCTGAGCCACACTGAAGAGATCAATTTCTCCCCCTCTGGGAAG  
GTGAGGAGTTTGACAACTATGCAGAATGCAGGTCAGCCCCTCTTTACGAA  
CACAGCCCAGCAATGCCTAAGACGCTCTGAGCAGGAATCTGCCTGGTCCT  
CCAGCCCTCTGGCTCTCCACTGGCTCTCCACTGACTCTTCGGGACAGCAA  
ATAAGGAGAGAATCTGGCAAAGACCCAGACTCCTGAGTCTGAAGGCCAC

CCTGGCTATGGTTGAGAGTCCTAAAGGAAGCCGACTGAGCTGGAGTTCCC  
TGAGCTGGGCTTTGGGGACCTTACAAAGCAAAGCTGGGTGCCATTTACA  
AAAACAAAGTTCCAAGAACCGCAATATCCAAATAACAGGCATGTCCCCTC  
ATGTGGCTCCGCAGATCCTACAGAGAATGAGGTAAAAGCAAGAGCTCCCA  
ATAGTCAGCCCTTCAGACGGAGCGTAATGATGACAGAGACCGAAAGCAGG  
ACTAAATGGGTTGGAAGCGGCAAGAGGACCGGCAGAGGTCCGTCTGCACG  
AGCTGATGCCACAGTCCAAGCTTTAGATAACCAGGTGGCAGCAGGAAGGA  
CGAGGAGGAAGGGCGGCTTCAGGAGGTATTCTGAACCAACTGGACGCTGC  
AATGGATTGGAAGTGACAGAACACTTGATTTACAAAAACACAGCCCATCA  
TTCCTGCCCCCTGCCCCACAGCCCTATACTTCAACCCAGGGTTCGGACT  
CAAACCTCTGTAGTTCTGGGAGCCTAAAAACAGGTACGGGGGCTTCAGGG  
GCTAAGAGAGTTGGGCTGGTCTTGTGGGACTGGGGAGGGGGTGCAGATGG  
GAACAGGCACACTGGGTTACTGGTTTGTGGTATGTTTGCTTTGTAAGAG  
GTGGTCGTTGGCCACAAGCCCAACCCATCACCAGTCTCCCTCATGGTCCA  
CACAAACGGCCTTTGCTGGGGTTCCAAGGCTGGGAATCCAGCTTTTGGCC  
TCAGCATCTTGATATAACCAATCCGGTCCACTTGGAGGAAGAACTGCCT  
TTCCAGCACCTAAAAATTCCAGCACAAAGAAACCAGCAAAGGCGATCCTTT  
CAACCAACGATCTTGTGGGTGCTAGTGAAGATATGGGCTCTGTCCGTGGG  
AGTAGAGGGCAAGGCCAAATTTGTTGGGGGTGGGGAAGGAGTGTTAGGAA  
ACGCACTACTAAGAAGAGCTCGCCTGAGA ACTCACTACAACCTGAGGCAC  
TGCCACAAAAACAGCCCTCCAGAGATCGAACCAGAAGCTCATCAGGTT  
AATAACTGACAATGGCACAAGGCGACATGATAGCAAACGAGAGACGAAGT  
CGGCCAAAGGCCCCAGCTGTCATCACAGCCTGGGAGAGCAGGTCCGCTGT  
CACCAACACCTTTTCTACAGCTGCCCGACCTTGTCCAAGCACCCAGCTC  
CTCTGGACTCTGACCGGACACTCCGCTTCTGCTGCCAGGCCTTTGCGA

CCCCAAATCCCCTCCTGTCACACTCCACTCTCTCCATGCTCCCCATCTC  
CAACGGCTCCCAGGGGACACAGAAACCGCCCTACCTTCCAGAGTGCCGAG  
ATCACTGAGGAACAGAGGAAAGCACTGGACAAAGAGGAGCTGGTGTGTTGA  
AGCAAGAAGAACACAGATGCCAGCTTGGAGGCCGCACTGAGCACGACAAG  
CAAAGGGACAGTGCCAGGCTCCCCTGCCGAGAGAAGTGACGCTCAGAGA  
AGGAGCCCCAACCTTGCATCTGCTGGGGGTGAGGGGTGCTGTGGCCCATG  
AGGGAGTGGAACGTGGGACTGAAGACAAATCCACATCTCTGTGCTCCCT  
GACCCGTCTGACACCCTCACTTTGCAGATGTGGAAAGGAGTTCTCAGTAA  
ACTGGGGGGCCAAGGAGATAAGGAATCAAAGATAACTGCCAGGTTTCAGCC  
CCTCGGGGACCAGGAGAATGAGGGTGCCATTCACACGTTTCAGCAGATCTT  
CAGGAGTCCCTGTGCAAGGCACCGCCTGACATTCTGAGGAGACAGATGAC  
AGCCGAATGCTGGGCACCGGGGAAATCCAACAACGACACCATGTGAGTG  
AGCTGTCAATTTCTGAACAGATCATCTGCAAACCTTTGCGCCGTCTCCGAA  
GCCCCGAGGGTAGGTGTGGCCGTCCATCAGCCACAGCCAGGGGAGAGCGA  
GAGACACAGGGGGCCCCTGGAGAGACCCAAGATCACCTTAAGCACAGCTA  
CCGAGTCCCCATCCACGCTGACTGCATACACCTTAATTACGGCACAAGAA  
CGGCCATTTGCCACACGGAAAAGGTCTTCCGCAGAATGAGCAGTGCGAG  
GATGGAGCTCCATGCTGGCACTTCCCTCAAACCTTTCAGAAATCCTCCAC  
GTATGCACGACACCGCTGTGCAAGCTGCTGCTCCTAGCTCCCGTGCTTCG  
GGCAGAAATGTTCTTCCGCAGCTCACCGCATGGACCCTGGTGATCGGAGG  
CAGACCAGAACCTGTGATGGGTGGTCATCCTCAGTGTCTCACAAAAGCAT  
GGACTAGGGAAGATAATCCGAGTCCAGGGATCCAGGGATCAAAGCCAACT  
CAGCTCCCACATGAGTTACTGGAGAAACGCACTGAATAA

>Ame\_R008184

ATGATCCAGCTAGTGGTACATGCTGGAAACCTCGTAGCAATTCGACCCTA

CCCTTCTTCTTCACTCCCCACCAGGCACCTGTTTCACGTGACCGACAATA  
CACTGGTGGACAAAGCTGACAAACTCTCTGCTCCTATTGAACTTATGTTC  
CAGTTCAAGAGGCAGATAAATTCCTGCAAGGTTAGTGACCTAGAGGATCT  
TCAAGGATTTACCATCCGGAGTAAATATCCACAAAGAAGAACACCTGCCG  
TGGCCTTTCAGAAGTCGGTCCCTCCACACCTAGTATCAGCTGCAGCTGGG  
AGGGTGCTTCGGTACATCCCCTGTGGAAAAGAGAGCATCGGGGACAACG  
CACCTCAGCGAGGCGGCAGAAGGAAGAGAGAGCGGAGAGGACCAAGGAGG  
AAGTCCCGGGTATTCTGAATACCCAGGGCTGAGCAGAGAAGCCGACGAGAT  
ACTCCGCAGACAGAGCCCGAAGCTGGGGATCTTGTGCACAGAGCACAGGT  
ACATGGACCATTGGAGTTTGCCACAGACGGCCCTGTTGGCCTCCTCCCAG  
CTGATACGTGTGTAGTTTGCAGAGAGGACCTTTTATCTGATGTGGGCTTT  
GCACAGAATGGCTCTCATCATAAGCTTGAAGGCCAGCCAGGCATCTGGT  
GTCTGTTAGACGGCTGTGCTGCGTCACCCTCATGATTGTCGGGGAACATC  
TCCTGGCATTACGCGACTGGAGGGAAGACCACGGGGCATGAAATGGCCT  
CATTAGTTTACATCTTCATTACTIONGCGCTTCCCACATACCTGCTTACATC  
TGGAGAAAATCTCCAGGGTTCGTCCACTCAACGCACATTTATTGAGCCCT  
TCATGGGCGAGGCCCGGGACCCCAAAACGGACACAAACGGACCTCCACT  
ATCATTGTCTGTGCCTCGCTTCTCGAGTTCATCGCACTGATGAATGGTC  
TCCCTCAGCCGATTTGGAGCTGCTTTGAGGACAGACGCTTTGAATAAAC  
CGTCTTAG

>Ame\_R008820

ATGAGTCTGGGCTTACTCAGCCGTCTCAGACCTGATTCTGGAGAAGCCCC  
AAGTCTGCCAGACCGATTTTCTGGTCCACCTCCAGCTCTAGCTGATGGTT  
TCTGTGAGCTGAGCTGGCACGACTGGTGCCCTTCTCCAAGTTGGAGCAC  
ATAATCAGAGATATGTATGCCAGTACAAAGCAACCGCCCTTCTGTGCTCA



ACCCTGTGTCATTTCTGTGTGGACAATCTTTGAAGAGGCAAATGGAAATT  
GGAGGCCTGCCATGTTTATCCAATCAGCCGCTGCTCACTATTTTCCAGCG  
AGCATTGATGTTTCTAAGGGCTATTTGGTTAGTGAAATCCCGGTCAAGG  
TCACCATGAAATAAAGAAGCCTGCAGGTCACTATACGAGGAGATTCTTCT  
GTGACTGAAACACAGCAGCCTGCTGTTAGGTGTGCTAACATGAAAACA  
GTGTTGGCTGGTGAGAGGGGAACAGGGGACCGTCTGAGCCTGAAGCACCT  
TGAGGTAGGACTTGGGGACTTGGCTGCGTTAGAGGCAGAACAGAGCTTTC  
CTCTCACTTCTCCTTGCACGTGCCCCATGCCCCAGACCAAGCCAAACGA  
GTCATGATGTGTGACTGGACAGTGACTGCCATATCTCCACGGCCATCAGC  
ATCTTTGATCCACACCTTCCAGGTGCATCTGCTCACACCTTCTGGAATCC  
TGAGACCGTGGGAAGACAGAGATGAGGCATCTGCCACATCTGCTCAGTG  
CTGTTGGGCAGTGAACCCCAACATCCCTGAACATCGTGCTTCAGGTCTC  
AGGTATCACACCACTCGTACAATCTATGGAAATCAAGGTCTCTGGGACAA  
CCTAA

>Ame\_R008980

ATGACTGTGCTCTTCTGGAACCTTAGCTGACACCAGAAGTGAGAGACGTAC  
AGTAGGAACTTCATCTGTGGAAGCAGACAGCCACAACCCGTCTCACCT  
GGGGGACCCAAAGATCCACAAAGAAGCCACAGTCTGCATGGGCAGGGGTC  
ACCACTCTGAGGGCCCAGGAAACATCTAAAACCAAAAATGACCCGGAGCC  
CAGGTCCGTCAGCAACAGGCGTATTTATCGTGTTTCTCCTGCCCGGGCAG  
CGTGCTGGGGAATGACCCATCCAGAAAAAGATATCTTAATTGAAGATAAT  
GAAATCTTGCCATCATAGGCATGCTGGACAAATGTGGTGCCTCTGTCCT  
CCAGCAACTCCTAGCCAGTCAGCGTCTGACTCACTCAGAGACCGGAGTCT  
GGAAGCCCTCTCGACGCTGTACAGAAAACCTCAGAGATGGAGTGGTAG

>Ame\_R011061

ATGGATAGGTCAGACCGTGTTAATGGTAGAGAAGGCCTCATCATAGTCCC  
TCAGACTTTCACAGAAGCCGTAGTAAAGCCCCAGAAGTTCTTCATCAATG  
AGACTCAGTGAAATATGTCACAGAAATCAGCATTCTCTGTATTAACATG  
AGAAAGAGAAGTCTTACCAATTATGAAGAATATTCACGGGTTGTGTCTGA  
GGTCACCAACGTCCCCAGAAGGCAAAGATTTATACCAACCAGAGCCACA  
TCATTGTGAGCTGGCAGGAAGATCGGTCAGACATGGCCAACACCTGGAAA  
AATCACACAGGCATCCAAATACTGCCATCCGTGGTAGAAAACCAAAGACT  
GGA ACTGAATTCCTCCATACTACCCACTCCAACAATGAACAGTTGGATA  
AGGAGACAGCAGTTCTCATTTGCTTAATTGTATGGACTATCATCAAATA  
ATGGAACAATATGGAGAAGTACACATACCAGTCCTGTTGACACAAGAAAA  
GTATGCCAACAATTGTTTTAAACTAATGTCAGATTAATAATGGGCTTGG  
AAGACCAACTTCTTCCCCAAATTCCAGCCACATTTTGTACAGGGAAGTG  
AGAAAGATGGCCTTCTGAGAATGTTTCTGAGTATAAGCTCCACAAAAGG  
CCCCCAACAACCACCCTGCAGGGCAGAGGAGGGGTCGGGTCTCACACTA  
ACAATTCAATGGTCGGCGCAACAAGGACATACACGCTTTCTGCTCCTAAC  
CGGGAGCCATTATGGAGGCAGGGCCACCCAAAGCAGCAAGAGGGGTGCC  
ACCAAGCTCTTCCCCAGGA ACTACACTCAGCATCTCAGCATCAAGCCCC  
TCGTAGCTTTGAACCGTGGCTGTGAGCATCTGTGCTTTATCTCAACTTAT  
TTTGTGCATCCCATAGCAAGATGTGCCCTAAAGTATCAGAAAATCCTAAG  
AGAGTATAAGCAGAAGAAAGTCATCCCATCACAGCAGCATTGTCTCAA  
GAAAAATATGTAAACTTCTGCCGGTATAGACCTCGCAGCCCAGCAAATT  
CGGCTAAGATGCAAACCCACTGGAACATCCCAAACGACTCTCCCCTACGA  
TCACCCGACATTCACGGCAGCAGGAAATCGTGCTCGCTCTTTACTCAG  
CAGAGACAAGCCAGCTGGATATCTTTCTGGTTGAGAAAATGTAA

>Ame\_R011984

ATGAACGCACCAGGTAGGGCTTTCCTCCTTGCAGCCACAGAACCTGAGAC  
GGCTCCCACAGACCCACACTTAATAGGGACAACAGTAAATGTGAAAGGC  
TCTGTGCGCCCCACATGCTCCTGGTTTCCCGGCCACCGGTGCTAATTGCA  
GAGAAAGACATCTCTAAGACATCTTTCAGAGATACCCCTTCTATTCT  
ACCACCGCCAGGGACTCTTTCATTCTTCCGTGAATGGCTCAACCATCTAG  
GAAAACAAGAGCAACTCCGAAAACCTGCAAACCACCAGCCATGGCCTCCAG  
CAGACGTTCTGGGGGCTCCCTGGACGACCACGCACGTGCAGGGTTAAGAA  
GCTGATCCGGTCCTACCTGTTGCTGACTTCAGGCCACAAGTTTCGAAACT  
CAACCCTCCAGTTATCCTCTCCCTGCTCACCACCCCTCCAGTGTGCCCC  
GCGCGAATCTGGGGCTGCCTCGCCAGCACTGCTTCTACCACCGTCACTTC  
GGCACCGCTAGATGAACGGGAATCATTACGTACGCTGGCCACAAGACA  
CATCTCAGATGCAGCCTCTAGATCCAGGGAAGAAAAATGATTTAAAAGCA  
GCTTCAAAGACAAAGGGAGATCCAGGTAAGCCCTTTATGCCCGAACCGCA  
GATGCTGTACATCTACCTACTGTAAGCGAGCACCTTGCTGGTGCCTGTG  
CCTTCCCTGACTCACCAGCCTAGCGGCTGTGGGGAGGGGCTTTGTGTGG  
GCCTGGAAAGGGCAGGCCACAGTGGGAAGGGAGAGGTTAGCGAAGGGTGG  
AGAGGAGAAAAGTGTGCCAGACACCACCCACTTTCCTTCTGCATCAAGGG  
GAGCTGGTGAAGGGTCCCCAGCTGCTGACCCGAGGACCTGGCTGATGAGT  
GCTGACTCTAACCCAAAGGAGTTAATCAACCGTTGGGCCCATATGGAGA  
AAAGCCACCAGAGAGAAAACCCAGTAAAGAGAAAATGGAATCCACTGTGT  
CAGAGTGTCTGGGGGTGATGAGTACTGCAGAGTGGGTTGTCTGGATTGGT  
TTTAAACTCATTCTACATCCCGTGGGAGTCTGGCTGGACAGATCCCTTG  
A  
>Ame\_R012522  
ATGCCGGCAGCCATCCTCCTCTGCGTCGGCGCTGTCCTCCCTCAACTTCG

TGTTTGCACAAATGTGCACACGCTTCGTTTGCTGTCTTCCTCGTTGACGC  
TACCACAGATGCTTCTAGAGTCTGTCTCCATACAGCGCGCTGCGCTGG  
GAGATCAGCCCGTGTCAAGTTCACAACCCCGCGCTCTGCCCCACGGGCACT  
GAACGAGTGGGGATGCGTCCACTGTCTTCCATTAGCCACACTGGGACCAA  
AGCCAGCTGTCTGGGCCAGACCCACACACACGGGGCAGTCCGTGTGTGC  
GTCAGTACCCTGGCCACATATCGAAGCCGCCAGAAATCCTGGCCAGCGT  
TTGGGTACATGAGAGACGGCCGCTGGAGGCCGGTGCACAACGCTTCCCC  
ACGCAAGGCACAGCCAGGACCCGAAGGAAGCAGCAGACCACAGTGAGGCT  
CCCCGAGGGCCTAGTCTGGAGCGGACCCCTGGCCTCCAGGTCCTGTGGA  
GACGCCCTGGATGAGGTGTGGACAGGACAGACTGCAGCTGTGTAATCCA  
AACTTAACAGCTCTTCCCGTGAGAAAATGTGGCCCATGGCTACAACAGCA  
CACGGACTTCCACATCTGGCTACAATGGCCCGGGCCTCAAGAACTGGTT  
GGCCTTAAAACTGGCTGTGGTTCAGTTTTTCACAAAGATGCATTCAGAG  
GCACGCACGAGGGGACAAGCAATTCTACAGCTGTGAAAGACACAAGCCTC  
AATGAGCCATGCTGCCACGAGCTCTTGGGGAAAGACACGATGTCAGGGGA  
GATGCCAGGGGAGCCGAGGAAGGTTTCGAGAAGTCACAGATGTTAGCAGAA  
CTCGCTTCCCGCACGAGCGCGCTGGACACCGCGCCGGGAGGCGAGCACGG  
GCCGAGCGGAGCTCACGTGGGACCGTTCACCTTCGCTGCGCGTCTGGAA  
CATTCCACAGGAAAACGCGGGTGACGACAACACTAAGTCCACTCTCGGAG  
CCCTGCCTTCCCCGAGGCTCACCCCGACCCGACTCCAGCCACAGAACTG  
CGGCGCCAGCAGGGCGTTTCAGGCGCGCGCAGCCCCAACGACCAGGC  
GGCAGGCCAGACGCGGGGGAACACAAGCGGCTGGCGGCGTGTGAATACA  
ATTATGAACACAGCAAAAGCAGGCACACGCAGACCCAGGGTCTCTGGGAG  
GACACACAAGCGAGGAGCACAGTGGGGACGGGGCCCACTCCCTGGACGGC  
CCCTGGTGGACTCTGGAGCCCCAGCAGGGCCTAGATGTGGAAGAACTCT

CCACACTCAGAGTGCCAGAGAGATTCTCAGCCAAGCCCCTAGTACCCCC

CTCGGGGCCAGATGGGACCCCAAGGACCCTGA

>Ame\_R013038

ATGGCCATTGCCGTGTCCTCCATGGCCGAGGTCTTGGTTGGGGAGGTGGT

GGGAGGAGCCCTGGACCTGAGAGAGACAATACAGAGGGGATGGCTTCTGA

AAGCAAGATCTGGCTCTTGCTTCAAGGCCAATAAAGAGAAAAACACGGAGG

CCGAAGAAATGCCAATGGGAGAAGGGATGCCTGTCCCCTGATTTAAAGGG

TATTCTCAGATCTAACGCTCTCCGGCTTGCATCGAGAGTAATATCACCA

GTTGCACTGATGTTTGCCGGGGAGGCTCTGTGGGCAGCCAGGAGACTCTC

CAAGGAGAATTATCCATCAGCACCCAGGACTTCCCATCCCTGGCCCCCTC

GGAGAAAAAAAAGACAAAATTTGGAAATGAAAGGTTCTCAAATCCAG

TAAGAAAGTTTTCTGCTCAGTGCTTGGGCGAACGGGTCACCAGCAGAAGC

AGTGA ACTACTGCAGCAGAAAAACCGGGCGATTCAGAACACAGACCGGC

CGCTATCAGCAGTGGACTTGATATCAAAAAGCCATCTCTTCCTCAACTT

GTGACTTGAAGGATGAGTGCGCATTTTTGAAAAGACACGACGGAGAGAAG

AAAAAATTAAGAAAATAGTGTGGTACAAGAAGACTGTCAGTGGGAGAG

AGGAAAACCAAAAATAGAAGAAAGAGGTGCATCTGTTAGGCGGGAGTGGG

GCATCATCAGGAATGGTCCATCCATCAGGGCACGTGTTCGAAGTAAACAA

TGCGAGCAGGTTCCAGCTGGCTGCAGAGAGTCAGGGCCTATTCACGTTT

CTGGTTTGAGACAAAACAGTCGGGTCTCGCTGGTGGGTACAAGAGATGC

TGGCCCAGAGAGAGCCACGCTGGAGGTGTTCAGAAGCAGAAGGAGCTGGC

TTCGGGGCCCTGCAGTGCTGGCAGCTTCGCACACAGATCCCTCGGGACCC

TGGTCCTGTGTGA

>Ame\_R013090

ATGGGCCTGTCCCCACTGCTGCTTTCGGCTTGTGACAACACCCACCCCGC

CCCGGGCTCCCCAGCCTCCCTGCCTGCTCCTCGTCTTCACTGGCATGTTG  
CATCTGCCACCGGCTGTATCTGCGAGAGGCTGGCCACTCCAGGCCAGCAG  
CCTGACCTCACATGGGCTCCAATTGCCCATGGCTCCCGCACTCAGAAGGT  
AGATTCCGGGTACGCCAGGAAGAATGTGGGCGTGGCAAGTTGGCAGGTG  
TGGCTGGCCCCCTGCGGGCCAAGGCCTGGGAGGGAGCCGGCAGAGGCTGC  
TCCTGCCTGATGGCCAAGGGCCGGGAGAGGCAGCCCGAGCCTCCCGATCA  
CTGTCCCACTGCCACCTGGCATGCACTGAACACGTCTTCTGCCTGCGGG  
AAGCCCTCTGGCTGCTCCTCAGCGATGGCCACCCGCGGGCATCTGACTCC  
CAGACAGGACCCCCAACCCACCACGCATGGCCCAGAAACAGAAGGCCTG  
GCTGCTGGCATCTTCCACACCCATCAGGGCAAGCTAAAAATGGCTGCGG  
TCACAGCCAAGTTGGTGAGCACCAGGGAAGGGGTGAGGGTGGAGGGTGGGA  
GCAAGAGCAGCCGGTGGGAGGGTGGACAATGACGTATTACGGCCAAAGCA  
GAAGAGGAAACCGAAAATACGGCCCGTTCACACTTCGGTCCGGCCGCGAC  
CCGTCCACCCCGGAAAGGCCACTCAGGAGTTGGTCTCGGGCAGGCTGTGG  
AATGGACCCGAATCGTATCCCCGTTTCTGCCCCCTCCCCTGAAAGACCT  
GGCCACTCGTTTCGGAGGCCACAGGGTGGCTGCACTCACGCTGGATGCTG  
AAGCAGAACTTCTTCTGCTGGTAGGAGATGTAGCTGGAGACCGCGCCGAT  
CAGGGCCATGGCCAGGGCGCTGGCCACACCCGCGATGCACCTCCCCCAA  
GTCAATCCCAGTGGGCTTCTCCCTGATTCTGGCAAGACCCGCTTCCTTA  
TGCCTATCGGATGCAAAGCCCAGACTGCAGCACTGGCTTTTTCAAAGCA  
CGGTCCGCGCTGTCGGAGAGCAGCAGCAGCAGACAGGACAGCACAGGGTC  
TTCTGTGTATCAGCAGGTCGGCAGAGAGGTCGCTTGTGAGGGCCTGGAGT  
CTGACGGTGTGCGCCCATCGGTGGGCCCTTCTGCTGTGCTGGGATGTGGC  
CACTGCCAAGGGTGTGAGATCCAGAGCGTCTCAAATACAAGACGGCAAT  
GCACGTACATGCACACACACGTGAGTCTTCACTCCGCCACAGCCACGGTC

CCAGGAAGCAGGGATGCAAGGCAGTGTCCCAGAAAGTCTTAAAGGTGCGG  
ATCTCCTCCATCCCCGCCTCCGCGATGAGAAAGCTCACCTCCAGCCAG  
AACACTGTACAGCTACCGCCCCATGACCATCTTTAAGGAGAACCCTCCCG  
AGAATGGAAAGGCTGTGACCCTGGATACCGGCAAGTATCAGTCAGTGGCC  
CATCCCTTTAGTGGATTCCCTGGGTCAACTTATCAAAGGCTTTTGGACAA  
CATGCCAGTAGGTGCTAATGACACCCCCCTCCACTCCAGATCCTTTAC  
CAACTCCGAACAGATGCAAGGAGCCAGAGGAAGATCAAGCAAAGCATTG  
CTTAACAAAGAGGCTGGACAAGTACAGCAGCTCCATCAAGCATGTAACCC  
AGACTGCGGATTCAGGCCCTCACGGGCCACACCTGGCTCCAGGTACATG  
TAAAGGGGGCCTTGATCACCGGCATACAGGGGTGCTTCCTCCATGCAGCT  
CATCACATTGGTCACACTTCATCCTTCACGCTAAGTGAACCAGATATAAC  
TGGTTGTAAGATTACCAGGTTCCCCCAAATCACTGCCTTCTGGCCCTCTG  
ACAGGGGCTATGACAGCCAGAACCACTGCCTCACCCCACTGGACCCTTTT  
CCTACCAGCCCTAGAGTCCCTGACCCTCTATGGAGAGCCTGCATTGCTCC  
AGGAGAGAAGAAAAAGCACCCAGACAATGCTCATCCCCAATGCCAATCCAA  
ACGCCTTTGGGGCCACGGTCTGGGTGTGACTAGTCTAGACATTTCATAAC  
CACCCGTTCTCACTCATCAGCTCTATGCCCAATCCTTCCATTGGCTGCT  
CTCTGCTAAACTAATTCAAGAGGCTCCCTGTATGCATGTTCCCAAAGAAG  
TCTACAGAAAGAAGAGTCATCCTCTTCTTCTCATTCCGCTCCACAGGAA  
ACTGTAGTGGAACCCCGTCCGGAGATGAAAGAAAAGGGCCGTTTTCTGTGG  
CTGCCCCTGTTGGCAAACAGCAGCACGTCTCGAGGAAATGAGCCCAAGG  
CCGGGGGCGCAGACAGGGGTTGGGCAAATCAGATTCCAACACTACCCCG  
AACGGCAAATGCCCGCCGAGCCTTTGACGTGAACACCCTCAAGAAGGG  
CTCCAGCTGCAGCCAGCTTTCCAGGACAAAGAGAGAGCTCCACTGCTCTC  
CAGAGTGGCAGAGCGGCGGCCGCCCCCCCCCGCCATTATTTGGCAACGGC

TGCCCAGGGCCACATTCTCTTTACAGGGTGGCTACTACCACCACCTCCGC  
CCTGTGCCCTCGGCAAGCTTCTGGTTACCTCCCCTGCGCCACCAGCA  
CCTCCAGAGACCCCCCACACCGGTGGCTCCCGCCCCGATGTGTCCTAAC  
TTCCAAAACAGCTGTTATGTCACTATCGCTAATGCAGAGTTCTGTTCTT  
GCTCAAAGTGCCACAAACCCCTCCTTGCAAAGTCCCCAAGGGGGCCTC  
CCCTACTGGTGGCCAAAATCAGCCCCACCTGGTGGTACCTGTTACCAGG  
GCCATTGGAATGGCCTTGCCACCACCTCTACTGCTGTTGAAGACTCTAGC  
AGAGGCGGTAGCCCTGGACCCAGAGCATGGGGAGGTCAGTAGCTCTCCA  
CTGTCAATTGTGAGAATTTTCCCTTAGAAACTCGGACCTTTGAATTTTC  
CAAGATGATCTTTCTGTGGCAAAAACCTGTGAAAGAACTGAATGA

>Ame\_R013224

ATGCCAGCAGGTTGGAAGCTAATAAGCACAATGGAAATGGGCCCTACTT  
AGTTACTATGGATACGGCAGATATAAAGGATTCTACTTGTGGTACTCAT  
CAGCAACTACTAACACGAAATCCCACATGCTGCTTGGACCTGACTGCGGT  
CATAAATGTTTACTGCACATACATGATATTCATACAACCTGCTGAGGCAGC  
AGAGCCACCACACAGGAAACAATACGTTTCTTGCCTCAATGTATAAAGG  
AAGGTGCAGTCGATTGCTGGGACCGGGACTTGCCTTGTGCCTGATTTGG  
CTAAACAGTTTCAGGAAATCCACGGAATGCTTTGTTCTGAAAAGCTGAC  
TGCACGACAAAACCTTAACTTTCCAGATCGAAAAGGAGAGAGAATCTGGG  
GAAGGTTCTCTGAAAGCTTCTGCAGGACCACTAGCGCCAGTGGGCACATC  
CGGAGCAAACACACCGGAGACACAGTTTTCTTCTTTGTGAACTCTGCCT  
TAACTCCAAGGTTGTCCCTGGGCTGAAGTGGACGGCTGCCGGCGCCTTC  
ACCGGTGCGCTCATCCTGCCTCCCGCCGCCGCGCTACCGCTGCCGCCG  
CCGCTGCTACCGCCGCCGAGCCGCTTCGCTCCGCCGCCCAAATGTGC  
CCAGCACCTTACGGGAGATCGGGCGATAGGGCTGGGGAATGAGGCAGGGT



GGGCGAGAGCTGGCGTGCTGCGAGGACTGCTGCTGCTCAGGCTGCCGCCG  
CTGCCACCATCAACACCGGACGTCCAGCGGCTGCCAAAAGAGAGAAGAG  
GGGAGGAGGAGGAGGAGAAGGAGGCGCTGCTGGTGGCGGCGGCAGCGGTG  
GGTGGGTGCCGGAGGTGGAGGTGGCGGTGGAGGTGGAGAGCAAGAAAGAG  
AAAGAGAGAGAGAAAACAAATAGCGCCTTGGGCAGTCGGAAAGCAAAGG  
AGGATGGGGAGATTCTGCCGGGATCGAGTTGGGCACTGAGCGCAAGCAA  
GGACGGAGCAGGGCACCGCGCCTCCTCGGGTGGCGGGAGCAGGCGGCAGC  
GGCACCGGAGAGTCGGAGGGGGACGGGCTGCTCGCTCCTGCGTCCTGCAC  
CAAGCGCGCTGCCCGGGCTGGAAGTTTTCTGA

>Ame\_R013753

ATGATCAATCTTATTAGCAATGCGCACTATGCTAACTATAGAGTTAAGGG  
TATGCTCTATGACAAATGCTCTGATTTAACACTGATAAACCAGCTGGAGT  
CAGGCAGCAACAGAGAGACCAGATTCAGCAGGCATCTAGGCTCTCCTTTT  
AAAGCAAAGAGTTGGAGTGGAGAGGCAGGTGTGCAGATGACTCTTCAGCC  
CCTTGTGGTGAAGGCAGAGGAATGTCCTAGGTCTGGAGAAAGTAACATCC  
GCGAAGCCAGGCAGCTAAAAGCAGTCAAACCTTTGTCTAGGCCAAAAGGT  
CCCATTGTTGCATTTGTGTATGCCATAATCTTAGATGTCCTGGCCACACT  
TAAGAAGTGGGGACACTTCAGTGCTGAGGAGGCTTTGACAGATGAAATTC  
ATACAGACAAGCATATCAGAGAGAGGAGGCTTCCTCCAAGAGAAAATTTG  
GTTGCAGATAATGGAGAACAGTCTGTCACAAATCAGCGTTTTAGCCCACA  
AGCAGAACTCATCCCTGCAGACGATGAAGACTCCTTTCCTGTCTGTGTGG  
TTATTTCCCCTCTTTCAGGGGAGCAGCTCAAAGACTCGGTCTTTGTCC  
TTTGACCGTAGTGATAAGGTGATTAGACTTATTCCAATACAGAAAAAGA  
AGCAAATGCACTGAAGAAAATATACCACCAACTTAAGGCTCCATACAGCC  
TACAAGCTTTTGACGCTCTCCTTACAGAGGTTCTGGATTTCCACACTCC

AAGCCCAAAGACTCCTACCTCGCTCTGCCAACTTCGTGACTCTAGGGCT  
GAATAGTTCAGGAAGAGAAAAGGAAGAAGAGAAAAGAGGAAAAGGAAGCAGG  
TAACTGTAGCAACTGTGGAAGCAAACAGATTGATGAAGGGAGAGACTACA  
ACCAGGGATATCAGTCAGGACCATAATGAAATAGACCAAGAGGGAAATGT  
TGAAGGTGTAGGTGCAGGAAATAACAGTAGCTTGATGAAAGGGGGTGACA  
GGAGGGTTGAGACCACTGAGTTTTGTAGCAACAAGGGTAACATTCGAAAT  
GACCAGCAAAAAGTGGGGTATTTCCAACACGGGACGGCAGCCAAGTGG  
AGCCAAGAGCGAAAATATGGGATGA

>Ame\_R014240

ATGACGGAATACAATAGCAACAAGAGGAGAAAGTGGGCCTATATGTACAC  
GGGTGTTAATCATTACAGGATGTCCGAGTAGGACCCCATCTCTGAGTC  
CATGGAAAGAACTTATCTATTCTAGCCCTTTTCCAATCTAACACCAAGA  
GAAATGCTCCCATGTCTTGAACTAAATTACAGATGTTGATTCAGGGACT  
CAGACTCAACAATGAACATGGACCCCTTCTGGAGGTTTTACATACAGC  
AGGCTCTTTCTGATAAACTCCCAGAGCGCAAGTTCAAAAGCTGCATTT  
AAGATGCAGCTACAACCTTTCACCTGTGCTGTGAAGATGAGTCACGTTCT  
GAGCTTGAAGCGGACCATGGAGCGGAGGGTCAGAGTCATGGGTGACATTC  
CGGAGTGTGCCTGTCACTTGATTTGGCTAAATAAATACTGTATGCTAACC  
GAGTTTTTCTGGAAATGCCAGCTTCCTTTTACAGAAAAAGCACCGAGG  
AGGTACTGTCTGCCTTGCCTGGACAGTGGAAGGGACTTGGGGCTTGGAC  
AGCAGTCAGCGTGGACTGAGCTGAAGCTGGAAGATGCTGGGGGGGGCCCA  
ACCGGGGGGCAGACAGGCCTGGAATCCTGGGGGGTTGGCAGCAGGACCA  
GTACCCTAGGTGCTGTAACAGAAGAATTGCACGTTTCATGACTGCTTTCC  
GCATTCAAGTGGGGGTGACTGCGCACACTGGCCTTGGACACTTGCTGGGA  
AGAGGGCTGCACGCAACGCCCCCTCAGGGGCGAGGTCCCTACACAGGCTC

TCTTCAAATTGTCTCCCTGACCAGCGGGTTCTCCGAAGGTTCAAACCTGA  
TGTGCCCGATGTACTGGCTACTATTTGGTCCACTGAGGAAAACAGAACTG  
CTTTACACACAGGGTTCGTGCATGTCGTCATATACAAAACAGTCCAATTT  
AGGCAGACACTGCAAATATCAGATGATGCTGGTGAGCTGGGATGGTGGTG  
AGGACGATGAAGGAATACATGCAAAGCGTCATGTAGAGTACGTGTCCCAG  
GACAGGTCCTTCAAAGGTGTTTATTTTCATGAATCAAGGAGTAAGTCAAAC  
AGAGAGGGACCTGACCGTTAAGCCAGTCTCAGATAAGGAAATGGAGCCAC  
AAGGGAACCTCAACCTTGCCACCATTGGTTTTTCTTTTCTGGAAGAGTAC  
GATCTTCATCTCCGAAGCATTGAAATTTTGCTGAGAGGCAGGGAAGGGTC  
TGTCCACAATGCTCCAAAGCAGAAGAACAACAAAACAGTCGAGAGAGCCCTC  
CTCAGATGCTCGCAAGGCCTTCAGCACGTCGGCTTTCCTTGTTGAACACT  
GTCAAGACAGGAAAACACTAGACAAGGCCACCAAGGGACTCTTGGCATCTGA  
ATTTATCACCAAGTACAAGCCTGCAGGGATAGCTTCTCCGCAAGTTCCAA  
ACAACAGCGAATCAGGCACAACCGCCAGAAAAAGTCTGTCACACACACC  
GTATGCTGGCTTCCCAGAGCCGCCGGCTACCTGCCTACACGGCATCTACC  
CTAG

>Ame\_R015262

ATGACAGGGGCTGCTCCTTCCAACGGCGGGCTTGAAACTCTCAGAGCTCTA  
CCAGGTAGACTTCACCTCTACCAGGTGGAGAGGCAGTACTTTAAGCCTTA  
AGGAAGAGACATCAGGGACACCAAGTAGTGGAGTTTATTGTGAAGATCCA  
TGGGACACAGGAAATCAGCGAATCCGATTGAACGGCCGGGATTCCAAGAG  
ACAAACACAGTTTGGGACTCGCCAGAGATTGCAGGAGCCTTGCGGCTCCC  
AGGGGGTGGTGCCCCTGCATTCTATCGACCGATCCAAAAAACATGTTC  
AATCGCAACAAGGAACAGCCTCAACGGCATAACCAAAGCAGTAAACCAAAA  
AGAGCTGGCCACTTTCGAGGTCTTCTGACTTCTAGAACAACGCAGGTGG

CAGCACAAATGGCGCCTGGGCACCCAGTTCCAACCTCAGGGTGAGGCTGGTA  
CCAGCCAGTACCTTGAATTGTCATTCCCCAGAAATGTCGACCCATTTCCC  
AGCTCTCCGTGGTCAGCAGACGGTTGCCAGGTGCAGAGCAAAGCAGGTT  
CACGCAAGCAGGGCCCTGAGTTGGTTCCACCTGTTCTCAGTGGTCACAAC  
AACAGCATTTGGCATGTACTGAGCGCGGTGCTGGGTGCTGTGTTACCAC  
TGGGGACATGCGGATAAATGGACAATCTTTGACTTCTGCAGCTTAGGCA  
TTGGCTGGAAGGCGACTAAAGAGAGGCGCCAAGAGCTGCCAGGGTCAGGT  
TGA

>Ame\_R017002

ATGAGGCAAAGGAAGCCTTATAAGGAAGTGAGAATCAAGCTGGACAGGAG  
TCGGGTTATTAGCACTGAGGAGTTTGGACTGGATTCTCCAGGTGATGGGA  
AACAGCTGAAGATCGGAAAACAGACAGCTCATTCTTATATGTTTTCAATG  
GAAAATTCAGGGTTCTATACACATGTATCAGTGCTGGACAGTTTTTGAA  
GAAGAATGTGGAAAAGAAGGCTTTAAGGTCTAAGGAAGAGCCCTTGGACT  
TAACATAA

>Ame\_R017525

ATGTTAGAACCTTACTTCAGGAATGCCCTCTGTGTCATTCTTCGGGGTCC  
ACTCACGGAAACGTGGCAGATACTAATCAGTCCCAGTCAGAAGAGCATG  
TGGTAATAGAAAGCCCTCTGGGGTGGAACACAGACTCCATGTACTCTGTG  
GTGTTTCAGGCCCTTCTGGCTGAGCCCTCACACTCCCATACGCCAGGTGA  
TGTCAGTTCATAGGCCAAGTAAAGCTTCAGTTACTCCATTCAGCCCTG  
AAATTATTTGA

>Ame\_R017671

ATGGCTGAAGGCGGCTTTGGACTCGAGTGCGGTGCATTCACGGCATGCG  
GGTGGCGCACTCGAGCCGCGGGGACCTGGGGCGGGCGGCCGCCGGGACGT

GGGGTGGGCCACCGAGGCTGAGGCTGGCTGTGCTGGCGCTGACACCATCC  
ACAGAGGTGCGATACGTACGAGGTGCCTGGACACAGAGGCTACTTAATAA  
AGGAATGATCGACTGTTGCTTGAAAAACACGTA CTCTGGGGCAAGAGTG  
GCGCAGATTCTATCTCTGTTCTATGCGTCCCCACCAAGTGCTTGTCGTAC  
CTGGATTTCAACGGGGACCACAATGGGTGGGTCACTTCTAAAATAGCGTC  
GTCTGTAAGTTTGCATCTTGAGCGAAAGATCCCCGGACGGATTGTAAGAA  
CCCCTGTGACTATTCCAAGCAGGCAGACAAAGCACAGTTTTCTGCATTT  
CTACTTGAAGCTTTCTGAAAACAGATTCTTCCGATTCAAATTCCAGGCC  
TTTCCAAGAAGGTGGAGACAGTGTTCCGAGTTCCTTGCTCACATCCCGAA  
GGCCCTGGGACCTGCCCGCGGCCTGGGGGGCGCTGGAGCTGCAGCTCCTG  
TCTCCTCCAGACACAGTTGTAGTTCCGGCGGAGATCCTTGGATGATGTT  
TGGCGCCAGCGTGGACATCACCGGCGACGAAAGTCACATAAGTGAATACA  
ATTTGTCCGTCTTCAAAGAGCCTCCAGTCCAGACCCCAGTGGGGGCCCTA  
GGCCATGCCGGACCCAGGATCCAGGCCCTGTGTGAGGTGGTCCACAGAGC  
AACTTGGCTGATTCACTCAAGCAGAGTGGTCACAGTGATCCTTTGGGATT  
TCAATGAGTCCCTGCCTACACATTATCCGTGGGTCCCAGAGCAGAAGGAT  
CCACCTATGCCTAAATCTACCAAGGTCCAACAGATGGCTATACCTGGGA  
CCCTCCAACCATCATGGCTCCGGACACACGGAACTACCTCCTCCAATAA

>Ame\_R018563

AACGAGCCTCTGACCCCAGGTTATCATGGATTCCCAGCCCGGGACAGCCA

G

>Ame\_R019548

ATGCTGAAAATAACAGGCTCAAGAAGAGTAAAGAAAATAACGACTATGCT  
ATTTCCCTGGACAGCGTCTGTGAAGGCCGTAGAGAGTTTATCCTAGCTA  
TAGTGCTCCAGATGTTACAGTCTCTGGTGAGATCTACAGACAAACTCAT

AAAGAACTAAAAAGACGAAAGAAAGAAAGAAAGAAAGGAAAGAAAGAAAG  
AAAGAAAGAAAGAAGGAAGGAAGGAAGGAAGGAAGGAAGAAAGAAAGAAAGAAA  
GAAAGAAAGAAGGAAGGAAGGAAGGAAGGAAGGAAGAAAGAAAGAAAGAAAGAA  
AGAAAGGGACTAAGAGGACCTTGGCTGCCAGAACTTACAGATCTTGGGA  
GACAGTGGAGCCATCTCCCACAACCAGGCACTACGTTCTTTATGGCCTC  
ACGTACCTTTCATGAGAAATGTTCTGGTGTGATGTCGGCAAGGCACAGC  
GTGTACTTAATCAAGAAGGATGGTGTGTTGGTTCACAGAGCTGAGCT  
GGAGGCTAAACAATCCAAAAGTCGTGCATGA

>Ame\_R004369

ATGGGACGACCCCCCTCCCTGCCCCCACAGCACTTCTGACCTCCATCCT  
GGTGCTGGGGTTGGGTTTGTCTCGGGGAAGGAGAGCCACGGAAGCCCGTC  
ACGCCCTGGTTGTGGAATACAAGGCACTGCTGGTACAACCTACCCCTATCA  
GACTTGAAGGGTGAAAGAGCAAGATATGTTTGTCTTTCACCATGGCCAT  
CAATGCACCTGCTGGTGATGGGGATTCTCTGGAAACAACCTCTGTGTTGT  
CAAGGAGCACAATACCGGAACACTGGAACCTTCCTTGATTATATCAGTAAG  
CTGCCAAAGCTGCTAAATTGCAAAGTGGCACCCAAATGGCTGCGGAAGGA  
CACGTACGAGTCTGTGTCCCTCCTAGTCAGAGTCCCTGTGTACATTCTG  
GTGCAGTTGGTTTATTCTTCTTTGTTGCACAGAATGGGAAGTTAGCCACT  
GCCAGACCTGTGTATTACTCAGCACGGGTTTTAATACGATAG

>Ame\_R013532

ATGAAGAGAGCACAGAACATATGTCTGTCTGCTCTGCTGCCCTGTGTATG  
TGCGGCTTCACTGGTACTTTCTGAGAGCACAACCTGTAAGCTTCAGAAGGT  
CCAAGGAGGAGCACCCGTCCTGGCCCAGAGACCTGAACTTGGGTCATGGC  
TGCAGCATGAATGCACAGTCTTTGTTAGAGAGGTCGGCCAGTAGACTTTC  
ACCAGGTGAAACATTCCACTGTATAGCGAATGATCAGTCAATGACTCTCA

AGTCCTGGAAGCAGCTGGATACTACAGAACGAGCAAATGAGCATACTAAC  
CTGAATGAAACAATCCTTTCTACTATACCCAACCTATAAAGCAACTCAT  
CTATGACACAACTACTTTACCCACCGCACGGGTACAGCAACACAGAAAG  
CAGATGGAACAGTGATCGCGAACAGACTCGAGAAGGAGTGCCTGCTGAT  
ACAGAGCCGATCCTGCAACCGAGAGAGACAGAGCTCTGGCTGGAGCAGCT  
TCTCTCCTCCGGAGTTATGCAACTCTATCCAGAAGGTGTGTATTTCTTA  
AGAAATCAGCAGCACTGGGTAAACAGGGTGCATCTGGTGAACACATGTCC  
ACGTACAGTCCAGGACGAACGCCTGCGGGCCAGAGCTGCAAGAAGAAAT  
GTGTACTGCACTGGTGAAAAGCACTGGAAAAGGCCTTCATTCTGGTTCTT  
ACGCATTTACCATAAGGGGTCAGGACATAATTTATTACCTTCATGGGC  
TGTTTGGAGAAAGGGCAAAGGGACATCTCTCGCCCTGGCCTCAAAGTAAC  
TCCTGTTCTATGATCTCTGCCAGCTGATGCTTCATCACAAAATTAACA  
AAAACATGGAGAATATGCAGACGATGTGGGGGCAGAGCCTTCTCTGCACA  
ACTGCAAAGACAGCATCCTGA

>Ame\_R006110

ATGGAATGGCCCGTCCGACTCCTGGCCTGCCTAGTGGGCATCCTCCCGAT  
GGGTGGAGGGATCACAGCAGCCGTCATCCTCAAGGGCTTCTGTGTCAGGC  
CTGGCACTCTTACCACAGCGCTACAAAGCAAGGACCCTTGTTCCTATT  
TTAAGGAGGCCTATGGAAGTCAGTGGTGGGGAGCCAGAGCATGGTTCGG  
TGCTCAGAGGAATTTACTAGTTCGGAACCGCTGCCGAGAAACCAACAAA  
AGGCAAGACAAATCACAGCAGTCGCCAAGCTCGCGGCGTGCAGGGAAAG  
GCCTGGGAGGAGATGGGCTGCTGTACGGGTCCAGAAGGAAATGGGAGCG  
TTTACAGGGGCCAGGATGCCGCTTCTGCTCCCGGCGGCTACACTGGCCAGC  
AGCCCACTACCCTCCCCGGCCAGCCTGGTCACCCTACCTTCTGCCCTC  
TTAGAGCAATTCAACATCAATGACTACATGAGCAGCCAGTTGCCAGGAC

ACCCCGCCACGACACTGCGTTGGGTGCCAAAACACTACGGCAAAATTCCCA  
ACTTCCGAAAACACATCTTATTGTGGAGAACTTAATAAACACATAAAC  
AAGATCATCTTCGATTCTGAAGTACAAGCTGTGAAGGAAATGGACAGAGC  
CACGCAGCAGAGCCCCGGGAGGGAGGCGGCTGCTGGGCGGATTTGTCTG  
AGGAGAAGAAGAGCAGCCCCGGCCTGGCCTCCTCCCGCAATTACCAATG  
TTATCAGGCCAGTTTTTGCACGACATAAAGCAGAACTACAGAGAGCTGGC  
CACTGGCCACCTGGGCTTGCCACGACGGAGTGGCGGGGAGACGGGAGCA  
GCACAGGGGAGGAGCTTGTTCATCGACCAGGAAGCTGCCAGACATCCCAGT  
CCGAAGCAGCACTTTCTTGCCAGAGGCGCTCCGAGGCTACGCGGTGAG  
CCGAGCTTCCACTGTTGCTAAGTCCGAGGGAGCCAGAGAGGAAGCACGTT  
CACTGACCATCTCTGATAATCAAGTTCAGTGTCAAATAAAATAGAGGGC  
ATCAAGCATAAACGTCTGCATCAACTTTAA

>Ame\_R017570

ATGGAGAATAACATGGAAGAAGTGTTAGAGCGTGGTTGGAAAAGACAAAA  
GCCAACTGGATATGCTGACTTTGGAAAGGAAAGGGCACCTGGGCTAGAAG  
GAACAATGCAAAAAAAGCCTAGTGTAGCTGACTTCAAAGGCTTAAGAAG  
ACAGATAAACTGAGTGTGCAGAAAAACATGACAGCAGCTTTACTAGAAAA  
CAGGAATTTTGAAGATATTTTAAAAGACTTGGTGTCTACAGTTAACAGTT  
GCACTGATCTGAAGCCAATGCCAACTGTTTTTGCCAGACTTCCCCTAT  
TCTACAGGAAAGGAAAAATGCCGCAAGCCTCAAGGTGGCAAATGGACCAG  
TCTGTACTTTAACCTTCTTTTTTATGCTTCTGGTTTTATCTTTCAAGC  
AACTCCCCATCACTTCTCAGGATTACATAAGGATTTGTGCCTTGAATTC  
AATGCCTCCCCCTGATAATCATGCACTCACTATTTGAAAGGCCAGTTGA  
AGATAACCCAGTGCCAGAGTTCATTCTATGATAAGAGGTCCACTCATG  
CAAAAGATATAAAGGCCAGGAGCCAGTATCATCACCATGGCCTTCAAC



CAGGGCCAAAATCCTAAATCTGGAAGTGTGGGATCCACTGAGATTGCAGC  
CAATGATCTGTCCATAGGCATAGCCAATGTAAACAATATGAACCAGGTCT  
ATGGCATTGGGAAATAATGGCTTTGAGGACAAATACCATGACATATTC  
CTTCTAAAGCCACAGATTCTGTCAGGACCCTGAAGAATAAGGTGTGCAG  
GCTTGAGAGAATGCGTTGGCTATTTTCATACAACTGACCAAGGATGAGG  
CTAAAGCCACTTCCTTCCCTCCTGGCTTCAAAGCGGCCACTACAACAGCA  
GCAGGCCATCCTCACAGTATTGACCACAGCCCTGATTTTTTCATCTGTACG  
CCAGGACTCAGAGCCAATCAACTGAAGTCTAATTTCAACCTCCTTAAAG  
AAGATGAGAAAAAGGTTTTGAAAGCTGACCAACTTAGCAATTACACCCCA  
TATTCCTACAAACAGAATAAAATGCCTCAACAACAAGCTGTCACAGACTT  
GGAGTTCCAAGGGCTCTCGAGAACAGGGAAATATTCTGAAACAGGTTCTG  
GAACTGCAGGAAGTCGGTCCTTTTGCCCCGAAGCGAAGAAAGGCGGGCG  
AAAGTCCCCGAGCCAGGGTCACCAGACGCTTGGAGCTGCAAGGATAGAGA  
AAGAGAGAGGAAAGGATCGGGGGAAAGCGAGAGGCGGGGGCACCGACCA  
AGGCCCTCTTCCCACTCTCCGCGAGCGACCTGGCAGAGGCTACGGGCTGT  
GTCCACCCAGCCCGCTCTCCGCGCGGGCCCGGCTGCCAGGCTACGCCTC  
CTGCACCCAGGCGGCTGCGGCCCCCTCCCTCAGACAACCCGACGCTGCTC  
ACCAAAGTACTTCTTTCCAAAAGTCAGGGCATCGCATGGGCCCGCGGCG  
GGCAGACGAGACACATCCGTGCCAGTACCGCCCGGCAGAAAAGGCATTTT  
CAACAAGTTCATCCCGAAGCCTGTACAGCCAATGCAAATGCGCCCCGC  
CACGGCTTCTTCCCGAAAAGCTGCCTTCCAGAATCTTTCTGCAGCATG  
CAGTTAACAAGATGGTTTTAAAAGGGAGGAAGGAAAAAGAAGTCCGAAGG  
AATCCGCGCAGCTGGAGTAATGCTATGCAAGTGGGGCGTGTATTTGGAA  
AACCCCCGTCGCCCCAACCCAGCGGACGAGCTCTGAGACGCGCTCTGCT  
GCACGACAGAAGTCCGAGGAGGAAGCCGGGCCGCGGTAGCTTCTCCG

CCTTCCCAGCAGAGGCACCGCCAGGAACCGAAACGGCCTCAGCGGCAGCT  
GCAGCAACACCAACCACTCAGTCTCCCGCAACGCTCGCTCCACGTGGAA  
GGAGCGCTCCACGAGCAAGAGCAAGAGTGGTTAAGTTGCAGAGGGGGTCC  
TGCGGCGGCGACTGTGATTCCAGCCAAAGCACAGAGTGCAGATGGAGACT  
TCATGGACACAAGTATGGACCTCTGCTACACGCTGGGCAGCCACACAGAA  
GCATCCTCTGACCTCAGTAGGGAAAACAGTAGCCAGAAGAAATACCGAGT  
GTCCTGGTCAAAGGGCTTATCCGCCGGGAAGTGCACCTTTATGGTGCCAG  
AAAGGCACAGAGTAACACAGTTGGGTTTTATAACTGGCCAACAGTCACA  
GCCAGTGTCTGCCGGCACATAGTCCCTGGGTGCTCGAGAACAGCCAGGAG  
CCGTGTGGTGCATCACCCGCCCTGCCTCACCAAGCCCAACCCACACCATC  
TCTCAGGCGGCACCATGGGTCTCAAACCAAGCAGGGAAAAGAAGTCGGG  
CCCAGTTTGCTGTACTCAAAGTTGTGGCCCCACTTTCGGCTTTTTTCTGG  
AACAAAAGGGCCTTCTACTTGGCAGATGAAGATAACTATTTTATGCATAG  
TGGGTATGCTAGAGGGTCCCAGGGCCTCCAGATATCAAACAGGCAAATG  
CAGAGCAAAGGTTCTGCCAAGGGTGGATGTGCAAATGGCAGTCTCAGAG  
CCCAAACACTGAAATGGCAAAGTGTCTCCCCTCTCTCCCCCAGATAGGA  
TGAAGGAATCTGAAAAGGGCTGGAGTGCATGA

>Ame\_R020040

ATGAGACTTCTCAGCGCCGTCCCCGGGGGCTTGCTGCTCAGCGCAGCCAC  
ACTGCGTTCAGCTGCCAGCCACAAGGTCCTTCTCCCTGTGGAGTCGACA  
GTAACCTTCTGGGGCGGACTCCACAATATCTCATGACTGAAACTGAATGT  
CACTGGATCCTTGAGTTCCCCAGTTCTCTCCCCGTTCTGGTGAAGGACAC  
CTTGCAGATGGCATCTCAACAGCAGGGCTCAGAGCCCCTACTCCAACCTCT  
ACTTCCATAACCTTGAACAAGGGGTGGTAGTGGCTGTCATAATTTTGGTG  
CAGGCCACGACAGTGATGCAAGCCATGGCAGTGAGAAGTAGGCTCCATGC

ATCTTCAGGACTTGCTCAGAGCCTCATCTCCATCCTCAGAACGACTGACA  
CCCAGACCTCTGCCCCAGTGGCCAGGAAAACAGCTGTAGCCAACTCTATT  
GACCGGACTTCCAAAGGTCAAATCAAGAACATCGTGCCGCAGATCAGCCC  
CACGAGTGCGTATGGCTCCCTGCAGCTCTCATTCCACGATCAGATCGCAG  
CAACAATCCACAATATCTTTGGTGGAGTAGGGGCCAGAGCAGCCCTGGC  
CCCACCACCGTGGCCCATCTGGGCTTACGTGGGCCCCGCTTTCATCAGG  
TCTGTGCCAGCTCCAAGGGCTTTCCTCACCCAGTAGCTTCATGTTGCAAA  
CCTTCTGA

#### Peptide Sequences

>Ame\_R000248

MFVAHTVDHGGVFHEAHSYRGDIKLTMQMIWVGTQLLAPEVHEFMREKI  
SAWAVQTNDMGVDNIEDFLSLHLQTRHDLISKKCHRKKTGVILRAYISS  
WFLGKCRSGCVGRKCTSLQQIGPVRASPDRAWSEEATEFLAEKWHTLTGY  
SVKILLVIKWSIQLTVASHTQQLANRNYFLEMTEGALPSCSSSPQSKR  
LPVDEQSGTVSALPVS LGVSWPLFIIGESFHEFENNVTTIPANVTVLIAY  
IGLKGPD

>Ame\_R000307

MSTEAIISITVLSTAIQGERNSKLWGQEGGLRVFAKLGIAVGGVATAADP  
DSEGLQTTWLSLATLLIWVKALQARDPVRTGCLQLYLGHQRKEHAAMT  
QGCKPHCSAKHRDVVRTKQGREVKKALKTTQCYAQQDGGGSNDADGEEEE  
DEKFKQKAQRGRNDEEMAENGISEVGLGLSAEGLPYSHPQRKLCETPTAG  
QEVGKVVSYLLESFNVVKPMKGHAETSLPLEAGGKTERQLGPYGSSEHL  
ENSDLSSKETCTKKLSGPSKAKKGGSAAMATCCRQESMEPSHLRLLIG  
KASCSPVIPVSITVSGTLRELDL FMRDSFLDSSHVLRGNIRRTSCTRVDA

TLCLASPWWEKGGRRHLVWSRRRATGLHVHEASKYGSRGAG

>Ame\_R000609

MQLRRALGCLEALTSEEPFPGVRASDVQAETQGSAPFLLIPQKEHNAKE  
KSHASQTPGTVDKNSLKRRLGLSQRCQGERIPAERSVWGDMLFCMIDASH  
VLESQAERVPAGLDAMGVCGRQRQIFQERLGGKALSKRSAGQFRGLYRC  
GVPGGTHNLEEGDPTAEVSPPGSGEDLTGAKATLESQFLKRSSGQGYDIG  
PAVFGDGHPEERRRLLAPRASLVKRKRLTRRFAQQSRPSFCKASFDLALNGS  
WAADTHSINFKGMRLINQEAPSVSPAIEVRKSGRAPLNPPGLGFSNPGQPSS  
PLRIRNSYPRVFLQGDPGVDTSAGFESVKIWLPLGEPWRGIYGCWLMV  
PGTFHWETRTVFRSSLHFPVYSVGGQFQTLALRPIGCQNDPLTPTLTRTH  
IQVYSDHPHLDWGEHCVQPAEGARSSSVQEPAGEAFLLYLGNADPFLRIR  
WGVGAGRAKQPPGFARPRKTKQHREPPPAGACASSPLAMVQLLVHTAAK  
ASSTFLPPSPHFTGDRALHAEEGPQLHGLPKSTGSLTKNVGVGGTEIMA  
KEERSEGGGMAEELRLAKREREREQEKHNPQIASQNLWLTRPFRKERSGT  
ALFMVGFDA SRPASPPGQKLKEEGKPAPGCGFIMSTNALKTFERSKETGV  
WDVRLAPRSPGFLAEKLAQAVRRRPRGLGPRKSVAAALNPKASYVPDPGCEF  
LTHRASEGRKLTSAATSLGNRAENAEIRTSNARTHMVNADSQRHGGEIHA  
YQVPRKTLSSCWTSLATYFGVAGVSLPVPIFQITLSTLSIPSPVASVNTP  
VPSGRRVPGWHLPGSGALPRSSGWLWGPARSPRERRRCSWSSCRSFVPLL  
QLPA

>Ame\_R000622

MRSLLRTAAGSSAAQATALGSADDAWEAPDRLRKVVRCVHGLRSWQRRH  
GGAVGCMLQSLWKIPLTGEEKHLDGALRQIMELIQRVTKQWGGRKIMSLK  
ILIDLECSFTLVDDIYSYQSLLVYLTRRTVTDLLICVMEIPAGLSGHLRR  
VCLHTCLLTPKEDELSTNLEAVLQWNDTENDYNPHVQTVLRTLTPARTHQ

DAELPSVLSVVLTSNLKGQKAGGTWRQKGKSPSTLRVSRFTVVYFFELTP  
LKNIKMQTGECLHDETGSSEVLRQGDTRVRKLTGGRTHVPRTCPFHVES  
LCFPRRAKNPKKKLPLLPGLCIPRLTKLSGIPDLIIRQRHESIKVLTPAH  
PKCCRLQSHSPCKAHPSPVKPFLISQKEIFQALSTYGVRLMTYHILPWV  
FAHTLEMQSWATRGA VVEFAWMPPLKRRIEGARDGKVSVDNLK

>Ame\_R002839

MLPPRSPKRAPPNKHPRRAPPDTLRRRAGAVISALLGPRGTRKYVGEKFP  
LPHGGEDVGGERAEDGEQRWEDVSGRRSKTAEVAVKENDDQQCSNTKI  
SRQRAPKGVRSKSRVPSRYLKSEGIRQRQLDKATWLLWGSATVCDVIR  
RRGVGTDSQSPAKLSSCLVAGRSGGKESRERKSTYRASRLGHKPTWMDS  
FPSLHVPGSPIICPGPFRLK

>Ame\_R002945

MCHVIYIPLFATPVDTVLDGYARFTYQRIYSSDIWTEARNGGGSQKTQD  
RYAPIGINKPILSFVELNCVLGIERETFHVEESPRALAKFGA

>Ame\_R005446

MWLSAASHLQPPGKAPAAPVFILALNAGKGSNVSSSLQVSTLDFLLDSNE  
QADKPGDLAPRQPFPLSHSSLRNWDRNRVTGGPVNLEPDVASGSQSLR  
SEVRRKRRGRGGSVERELRGQEAREGLEASRQAAAPAHPREAEGAAGTGP  
CAPSLRDVAGGGRGAFKNLSAGEQNKHSCSEDKGFNTCKPAGDKKASGF  
APLRVPLPFSTLVLRGLTTPPVVTSYPGLYEPSYSAQPAAVGTVSTSLGRK  
RPTEESYTWYFVLDKRMDDDREDTEPLRNPGHQKAMLVFDEEAAMCLCS  
SNAISRRADTTQALFFLPTGWTEKGVLIKHTPPEKKGGEYPPCTAPTYP  
SPPSVPLTLGEKYSYWTAGKGHLEETGQQQALTSFDPKTCIKINRAHGGL  
IAGFVNTGVAEIQLTCSFGVQRKAPLHLPPLSGSSQGSVSPGCSCSGRT  
LTLGGRAGDLSQYSCWPQTQAFSVNRCRLLAIGHNQAIPITGNTPGRTET

IASCRHRESGRKEHRRSSCTNKGLLWISEANRWKAMGKELVEQEMAWGAM  
NPGTLLVPPLAPRPQVTEEMPLPILSLQRALENDAAHKQVYIGGWLRNKS  
DSSNPPKPNASVRDASRGLDTLFPKHTADGDGEINDWKQTKVAVNKVHRI  
KMGESIGKRHFGVVKRTRSQP

>Ame\_R006158

MAVVLERNSHPYPLPHGATTPIQTPNASNTAYLLPPAVRAESQPKGRKEA  
NTMGRLWLTGVLTCAYCGLEGAEVGGWELSPDELCKTESPLWAAYLNAR  
RFWAKSAVYRTAVTSLDHPIPLAPTPLAFPLGGKETFDSSLHEVFKYPKP  
MTRSLMHMRNIEVRLHNPYTFARCLKQILAGPKMCSSCLSPCFVSYNPAH  
LAMTSGATALGKATESWPHGQARVLAGYFFNPLHTDTPRSQNLGVVDFLP  
LSRVQIRVPEHGHADSNIILTAQNETGTQTGTTSLIIGVDACGTPPTYQV  
LLGAGNTRPRVCEHADAEASQRITV

>Ame\_R007364

MEIPVKLSILNPVLYFNMLFDSSCVSEADPFHYASLLRHSQQKEAITGNR  
VFVEVGVQERWMLLCDPRSQRNVPSPGVCVGLCSSALFEGVGGIAREFVH  
KDGYSVGRQLLLSKSRKTTAKRMTVLIMAAFPISDIQLSPRQTITA

>Ame\_R008064

MGTIRFTWREQSLYRDRRQGGEVRRGEQMPDARLSVELSKGRGHGSFLGLV  
ILPRSTRPRQTGCVRIYFGHTAANTGFMKLFGARLPGGWCAKLLLSQLSR  
RPSPFLLSLRGQYSGSHGLPVSASAAPLTPHRALTTDRGDHVMSVTDITQ  
KQEGQPTDPAQQVPDPEEALNVMFPIRLATPSRFPISIRGHSTQQVLPS  
DAPPPRSPVRPVLHPLQSTPSHTWLALFRKRGLPALKQPKCTAHS  
AQSSSEALSTTRPICFCASLTPSRTTEANGDRKLETSGAHRFQLICTADL  
QNSDNPEVSRRLTATFNISFTLFSHFKRHLIAKAEMKGSWNSLSRLDR  
TDSKAAKVPAPPEEDRAPLAAASTMAQCRWVGGGAPRDLPERRAPFLLKKV

LPGQMGGPDVLLQQKRNQSKRGLVDSPGCTWNRHLSKRTAQKASKHFPNDA  
LWTPSENASLKTTRERERTLRRSKVASTAAHSDLPGGNIPEMAILEKA  
LLKHLDKKDPGPQKPPQRAWQDRPESKTRTMPMSMKTRDSSKWMTHHPTKR  
SWVPITAKALQVLGAERGVRAVRTGWRQVAVLQRVYGM MENLAFPIPRL  
QLTLSVDSGMYLWLCPDMTLGCHPTNPQLWELDYLLISSTSELLAEGP  
KRPVGHTSVVQALAEAEDGHRHFLRERRGAKGAHV DQRAECLIHSLCPPW  
TTVWRRTAETAGNDTPVFISGRTLNSVTSARVLEEDQVREW TENRGRKTR  
QEAVGESPRSGRESQDRDTGKGYRKDRLKRHFEGKINRIWYLNQETNQR P  
FLTLDTGLKGKKTANTEKFKWESRFRSECANPLLSSQNW TQASAVEASNV  
EKTVKHEENCYVGYKTRPQMAKGNAGLILALPQPD LQGFNEGSYRW FNTI  
TALGDDYNLVREMAHEHTGPQYKAISAKYHPG SEREQAYPGATDADLISF  
SLLDPVQSITVQDQLRERSQILITQIPSRHYTRNP NTHHGTSP LRRNCS  
ALGVSKTCQLQRRNTHPFSTIQLPSHSFLVHPD SSSSHIQTCEARAKNGD  
SGNHYNQLAVTAAASNSPPAGPAGVRSTASAGR QKAGQGAEGLRNSLGQP  
EHPLPIIHAQLSPTSLTAFRIISKCSPIWTETP QGGLSHTEEINFSPSGK  
VRSLTMMQNAGQPLFTNTAQQLRRSEQESAW SSSPLALHWLSTDSSGQQ  
IRRESGKDPRLLSLKATLAMVESPKGSRLSW SSSLWALGTLOSKAGCHFT  
KTKFQEPQYPNNRHVPSCGSADPTENEVKAR APNSQPFRRSVMMTETESR  
TKWVGSGKRTGRGPSARADATVQALDNQVAAGR TRRKGGFRRYSEPTGRC  
NGLEVTEHLIYKNTAHHSLPPAPQPYTSTQGS DSNSCSSGSLKTGTGASG  
AKRVGLVLWDWGGGADGNRHTGLLVCLYVCFV RGGRWPQAQPITSLPHGP  
HKRPLLGFQGWESSFWPQHLDITNPVHLEEETA FPAPKNSSTRNQRRSF  
QPTILWVLVKIWALSVGVEGKAKFVGGGEGVLGN ALLRRARLRTHYNLRH  
WPQKTALQRSNQKLIRLITDNGTRRHDSKRETKS AKGPSCHHSLGEQVRC  
HQHLFLQLPDLVQAPSSSWTLTGHSASCCQAFAT PNPLLSHSTLSMLPHL

QRLPGDTETALPSRVPRSLRNRGKHWTKRSWCLKQEEHRCQLGGRTEHDK  
QKGQCQAPLPREVTLREGAPTLHLLGVRGAVAHEGVERGTEDKFHISVLP  
DPSDTLTLQMWKGVLSKLGQGDKESKITARFSPSGTRRMRVPFTRSADL  
QESLCKAPPDILRRQMTAECWAPGEIQQRHHVSELSFLNRSSANLCAVSE  
ARRVGVAVHQPQPGESERHRGPLERPKITLSTATESPSTLTAYTLITAE  
RPFATEKVFRRMSSARMELHAGTSLKPFRRNPPRMHDTAVQAAAPSSRAS  
GRNVLPQLTAWTLVIGGRPEPVMGGHPQCLTKAWTREDNPSPGIQGSKPT  
QLPHELLEK RTE

>Ame\_R008184

MIQLVVHAGNLVAIRPYPSSSLPTRHLFHVTDNTLVDKADKLSAPIELMF  
QFKRQINSCKVSDLEDLQGFTIRSKYPQRRTPAVAFQKSVPPhlvsAAAG  
RVLRYIPLWKREHRGQRTSARRQKEERAERTKEEVPGIRIPRAEQRSRRD  
TPQTEPEAGDLVHRAQVHGPLEFATDGPVGLLPADTCVVCREDLSDVGF  
AQNGSHHKLGRPARHLVSVRRLLCCVTLMIVGEHLLAFTRLEGRPRGMKWP  
HSVYIFITALPTYLLTSGENLQGSSTQRTFIEPFMGEARDPTNGHKRTST  
IICLCLASRVHRTDEWSPSADLELLLRTDALNKPS

>Ame\_R008820

MSLGLLSRLRPDSGEAPSLPDRFSGPPPALADGFCELSWHDWCPSKLEH  
IIRDMYASTKQPPFCAQPCVISVWTIFEEANGNWRPAMFIQSAAAHYFPA  
SIHVSKGYLVSGNPGQGHHEIKKPAGHYTRRRFFCDTETQQPAVRCANMKT  
VLAGERGTGDRLSLKHLEVGLGDLAALEAEQSFPLTSSLHVP HAPDQAKR  
VMMCDWTVTAISPRPSASLIHTFQVHLLTPSGILRPWEDRDEASAHICSV  
LLGSEPPTSLNIVLQVSGITPLVQSMEIKVSGTT

>Ame\_R008980

MTVLFWNLADTRSERRTVGTSSVEADSHNPSSPWGTQRSTKKPQSAWAGV



TTLRAQETSKTKNDPEPRSVSNRRIYRVSPARAACWGMTHPEKDILIEDN

EILSIIGMLDKCGASVLQQLLASQRLTHSETGVWKPSRRCTENSEMEW

>Ame\_R011061

MDRSDRVNGREGLIIVPQTFTTEAVVKPQKFFINETQWKYVTEISILCINM

RKRSLTNYEEYSRVVSEVTNVPQKAKIYTNQSHIIVSWQEDRSDMANTWK

NHTGIQILPSVVENQRLELNFLHTTHSNNEQLDKETAVLISLNCMDYHQI

MEQYGEVHIPVLLTQEKYANNCFKTNVRLIMGLEDQLLPQIPAHILYREV

RKMAFLRMFLSISSTKGPPTTTLQGRGGVGSHTNNSMVGATRITYLSAPN

REPLWRQGHPKAARGVPPSSFPARNYQHLSEIKPLVALNRGCEHLCFISTY

FVHPIARCALKYQKILREYKQKQKIVIPSQQHLSQRKICKLPAGIDLAAQQI

RLRCKPTGTSQTTLPYDHPTFTAAGNRARSFTHAETSQLDIFLVEKM

>Ame\_R011984

MNAPGRAFLAATEPETAPTPTLNRDNSKERCAPHMILLVSRPPVLIA

EKDISLRHLSIPLSILPPPGLTSLFFREWLNLHLGKQEQLRKLQTTSHGLQ

QTFWGLPGRPRTRCRVKKLIRSYLLTSGHKFRNSTLQLSSPCSPPLPVCP

ARIWGCLASTASTTVTSAPLDERGIIHVRWPQDTSQMQPLDPGKKNDLKA

ASKTKGDPGKPFMPEPQMLSHLPTVSEHLAGACAFDPSPLAAVGRGFVW

AWKGQATVGRERLAKGGEEKSVPDTHFPSASRGAGEGSPAADPRTWLMS

ADSNPKELINRWAPYGEKPPERKPSKEKMESTVSECLGVMSTA EWVWVWIG

FKLIPTSRGSLAGQIP

>Ame\_R012522

MPAAILLCVGAVLPQLRVCTNVHTLRLLSSSLTLPQMLLESVSHTARLRW

EISPCQFTTPRSAPRALNEWGCVHCLPLATLGPKPAVWAQTHTHGAVRVC

VSTLATYRSRPEILASVWVHERRPLEAGAQRFPHARHSQDPKEAADHSEA

PRGPSLERTPGLQVPVETPVMRCGQDRLQLCNPKNLSSSREKMWPMATTA

HGLPHLATMARGLKNWLALKTGCGSVFHKDAFRGTHEGTSNSTAVKDTSL  
NEPCHELLGKDTMSGEMPGEPRKVREVTDVSRTFRPHERAGHRAGRRAR  
AAAELTWDRSPSLRVWNIPQENAGDDNTKSTLGALPSPEAHPDPTPATEL  
RRPAGRFRRRARSPNDQAAGPDAAEHKRLAACEYNYEHSKRHTQTQGLWE  
DTQARSTVGTGPTPWTAPGGLWSPQQGLDVEELSTLRVPREILSQAPSTP  
LGAQMGPQGP

>Ame\_R013038

MAIAVSSMAEVLVGEVVGALDLRETIQRGWLLKARSGSCFKANKEKTRR  
PKKCQWEKGCLSPDLKILRSNALRLCIESNITSCTDVCRGGSVGSQETL  
QGELSISTQDFPFPGPSEKKRQNLEMKGSQNPVRKFSAQCLGERVTSRS  
SELLQKNRAISEHRPAAISSGLVYQKAISSSTCDLKDECAFLKRHDGK  
KKIKENSVVQEDCQWERGPKIEERGASVRREWGIIRNGPSIRARVRSKQ  
CEQVPSWLQVRAYSRSWFETKQSGPRWWVQEMLAQREPRWRCSEAEGAG  
FGALQCWQLRTQIPRDPGPV

>Ame\_R013090

MGLSPLLSACDNTHPAPGSPASLPAPRLHWHVASATGCICERLATPGQQ  
PDLTWAPIAHGSRQKVDSDGYAQEECGRGKLAGVAGPLRAKAWEGAGRGC  
SCLMAKGRERQPEPPDHCPTAHLACTEHVFCLREALWLLSDGHPRASDS  
QTGPPTPPRMAQKQKAWLLASSHTHQGKLMMAAVTAKLVSTREGVRVEGG  
ARAAGGRVDNDVLRPKQKRKPKIRPVHTSVRPRPVHPGKATQELVSGRLW  
NGPESYPRFCPPPLKDLATRFGGHRVAALTLDAEAELLLVGDVAGDRAD  
QGHGQGAGHTRDAPPPKSIPSGLLPDSGKTRFLMPIGCKAQTAALAFSKA  
RSALSESSSRQDSTGSSVYQQVGREVACEGLESDGVGSPVGPSTAVLGGC  
HCQGCQIQSVLKYKTAMHVHAHTRQSSVRHSHGPRKQGCKAVSQKVLKVR  
ISSIPRLRDEKAHPPARTLYSRPMTIFKENPPENGKAVTLDTGKYQSV

HPFSGFPGSTYQRLLDNMPVGGANDTPPSTPDPLPTPNRCKEPEEDQAKHL  
LNKEAGVQQLHQACNPDCGFQALTGHTWLQVHVKGALITGIQGCFLHAA  
HHIGHTSSFTLSEPDITGCKITRFPQITAFWPSDRGYDSQNHCLTPLDPF  
PTSPRVPDPLWRACIAPGEKKKHQTMLIPNANPNAFGAHGLGVTSLDISY  
HPFSLISSMPQSFHWLLSAKLIQEAPCMHVPKEVYRKKSHPLPSHSAPQE  
TVVEPRPEMKEKGRFRGCPLLANSSTSRGNEPKAGGADRGWAKSDSNTTP  
NGKMPAAAFDVNTLKKGSSCSQLSRTKRELHCSPWQSGGAPPPPLFGNG  
CPGPHSLYRVATTTTSAHCALGKLPGYLPCATSTSRDPPTPVAPAPMCPN  
FQNSCYVTIANAEFLFLQSATNPSLQSPPRGPPLLAKISPTWWYLFTR  
AIGMALPPPLLLLKTAEVAVALDPEHGEVSSSPTVNCENFLETRTFEFF  
QDDLVAKTCERTE

>Ame\_R013224

MASRLEANKHNGNGPYLVMTDADIKDSYLWYSSATTNTKSHMLLGPDCG  
HKCLLHIHDIHTTAEAAEPPHRKQYVSLPQCIKEGAVDCWDRDLPLCLIW  
LNSFRKSTEMLCSEKLTARQNLNFPDRKGERIWGRFSEFCRTTSASGHI  
RSKHTGDTVFFLCELCLNSKVVPGLKWTAARRLHRVRSSCLPPPPLPLPP  
PLLPPPQPLRLRRPKCAQHLTGDRAIGLGNEAGWARAGVLRGLLLLRLPP  
LPPSTPDVQRLPKREKRGGGGGEGGAAGGGGSGGWVPEVEVAVEVESKKE  
KEREKTNALGSRKAKGGWGDSAGIELGTERKQRTEQGTAPPRVAGAGGS  
GTGESEGDGLLAPASCTKRALPGLEVF

>Ame\_R013753

MINLISNAHYANYRVKGMLYDKCSDLTLINQLESGSNRETRFSRHLGSPF  
KAKSWSGEAGVQMTLQPLVVKAECPKRGESNIREARQLKAVKPLSRPKG  
PIVAFVYAIILDVLTLLKKGWGHFSAEEALTDEIHTDKHIRERRLPPRENL  
VADNGEQSVTNQRFSPQAEIPADDEDSFPVCVVISPSFRGAAPKTRLSL

FDRSDKVirLIPNTEKEANALKKIYHQLKAPYSLQAFDALLHRGSGFPHS  
KPKDSYLALPNFVTLGLNSSGRERKKRKRKRKQVTVATVEANRLMKGETT  
TRDISQDHNEIDQEGNVEGVGAGNNSSLMKGGDRRVETTEFCSNKGNI RN  
DQQKLRGISNTGRQPSGAKSENMG

>Ame\_R014240

MTEYNSNKRRKWAYMYTGVNHSQDVRVGPSPSLPWKELIYSSPFPNLTPR  
EMLPCLGTLQMLIQGLRLNNEHGPLPGGFHIQQALSDKLPERKFQKLHF  
KMQLQPFTCAVKMSHVLSLKR TMERRVRVMGDIPECACHLIWLNKYCMLT  
EFFLEMPASFSQKKHRGGTVCLALDSGRDLGLGQQSAWTELKLEDAGGGP  
TGGQTGLEILGGWQQDQYPRCCNRRIARFMTAFRIQVGVT AHTGLGHLLG  
RGLHATPPQGRGPYTGSLQIVSLTSGFFRRFKLMCPMYWLLFGPLRKTEL  
LYTQGSCMSSYTKQSNLGRHCKYQMMLVSWDGGEDDEGIHAKRHVEYVSQ  
DRSFKGVYFMNQGV SQTERDLTVKPVSDKEMEPQGNLNLATIGFSFLEEY  
DLHLRSIEILLRGREGSVHNAPKQKNKNSRESPPQMLARPSARRLSLLNT  
VKTGKLDKATKGLLASEFITKYKPAGIASPQVPNNSESGTTAQKKSVTHT  
VCWLPRAAGYLPTRHLP

>Ame\_R015262

MTGLLLPTAGLKLSELYQVDFTSTRWRGSTLSLKEETSGTPSSGVYCEDP  
WDTGNQRIRLNGRDSKRQTQFGTRQLQEPGSGV VPLHSYRPIQKNMF  
NRNKEQPQRHTKAVNQKELATFRGLLTSRTTQVAAQWRLGTQFQLRVRLV  
PASTLNCHSPEMSTHFPALRGQQTVARCRAKAGSRKQGPPELVPPVLSGHN  
NSIWHVLSAVLGAVFTTGDMRINGQSLDFCSLGIGWKATKERRQELPGSG

>Ame\_R017002

MRQRKPYKEVRIKLD RSRVISTEEFGLDSPGDGKQLKIGKQTAHSYMFMSM  
ENSRVLYTCISAGQFLKKNVEKKALRSKEEPLDLT

>Ame\_R017525

MLEPYFRNALCVILRGLTETWQILISPOQSEEHVVIESPLGWNTDSMYSV  
VFQALLAEPSSHSTPGDVSSHRSKASVTPFSPEII

>Ame\_R017671

MAEGGFLECGAFHGMVAHSSRGDLGRAAAGTWGGPPRLRLAVLALTPS  
TEVRYVRGAWTQRLLNKGMIDCCLKNTYSWGKSGADSIKLCVPTKCLSY  
LDFNGDHNGWVTSKIASSVSLHLERKIPGRIVRTHCDYSKQADKAQFSAF  
LLEAFKTDSSDSNSRPFQEGGDSVRSSLLTSRRPWDLPAAWGALELQLL  
SPSRHSCSSGGDPWMMFGASVDITGDESHISEYNLSVFKEPPVQTPVGAL  
GHAGPRIQALCEVVHRATWLIHSSRVVTILWDFNESLPTHYPWVPEQKD  
PPMPKSHQGPTDGYTWDPTIMAPDTRNYLLQ

>Ame\_R018563

NEPLTPGYHGFARDSQ

>Ame\_R019548

MLKITGSRRVKKITMLFSLDSVCEGRREFILAIPLDVTVSGEIYRQTH  
KELKRRKKERKKGKKERKKERRKEGRKEERKKERKKKEGRKEGRKKERKKE  
RKGLRGPWLPETYRSWETVESSHQALRSLWPHVPMRNVLVSMSARHS  
VYLIKKDGVVLVHRAELEAKQSKSRA

>Ame\_R004369

MGRPPSLPPTALLTSILVLGLLGGRRATEARHALVVEYKALLVQLPLS  
DLKGERARYVCLCTMAINAPAGDGDSSGNNSVLSRSTIPEHWNFLDYISK  
LPKLLNCKVAPKWLKDYESVLLVRVPVYIPGAVGLFFFVAQNGKLAT  
ARPVYYSARVLIR

>Ame\_R013532

MKRAQNICLSALLPCVCAASLVLESTTVSFRRSKEEHPWPRDLNLGHG

CSMNAQSLLEERSASRLSPGETFHCIANDQSMTLKSWKQLDTERANEHTN  
LNETILSYTQLIKQLIYDTNYFTHRTGTATQKADGTVIANRLEKECTAD  
TEPILQPRETELWLEQLLSSGVMQLYPEGVYFFKKSAAALGKQGASGEHMS  
TYSGRTPAGPELQEEMCTALVKSTGKGLHSGSYAFHHKSGHNFITFMG  
CLEKGQRDISRPLKVTVPVPMISAQLMLHHKINKNMENMQTMWGSLLCT  
TAKTAS

>Ame\_R006110

MEWPVRLACLVLGILPMGGGITAAVILKGFCVPRPGHSSPQRYKARTLVPI  
LRRPMEVSGGEPRAWFGAQRNLLVRNRCRETNQKARQITAVAQARGVQ GK  
AWEEMGCCHGSRKWERFRGQDAASAPGGYTGGQPTLPSASLVTLP SAL  
LEQFNINDYMSSQLPRTPRHDTALGAKTTAKFPNFRKLTSYCGELNKHIN  
KIIFDSEVQAVKEMDRATQQSPGEGGGCWADLSEEKSSPGLASSRQLPM  
LSGQFLHDIKQNYRELATGHLGLPTTEWRGDGSSTGEELVIDQEAARHPS  
PKQHFLGPEALRGYAVSRASSTVAKSEGAREEARSLTISDNQVPSNKIEG  
IKHKRLHQL

>Ame\_R017570

MENNMEEVLERGWKRQKPTGYADFGKERAPGLEGTMQKPSVADFKRLKK  
TDKLSVQKNMTAALLENRNFEDILKDLVSTVNSCTDLKPNANCFPDFPY  
STGKEKCRKPQGGKWTSLYFNLLFFMLLVLSFKQLPITSQDYIRICALNF  
NASPLIIMHSLFERPVEDNPVPRVPFYDKRSTHAKDIKAQEPSITMAFN  
QQQNPKSGTVGSTEIAANDLSIGIANVNNMNQVYGIWEIMALRTNTMTYF  
LLKATDSVRTLKNKVCRLERMRLWFSYKLTDEAKATSFPPGFKAATTTA  
AGHPHSIDHSPDFSSVRQDSEPINLKSNNLLKEDEKVKLADQLSNYTP  
YSYKQNKMPQQQAVTDLEFQGLSRTGKYSETGSGTAGSRFCRSEERRA  
KVPEPGSPDAWSCKDRERERKSGGESERRGAPTALFPLSASDLAEATGC

VHPSPLSARARLPGYASCTQAAAAPSLRQPDAAHQRYFFPKVRASHGPAA  
GRRDTSVPVPPGRKGISNNCSSRSLYSQCKCAPRLLPRKAAFQNLSCSM  
QLTRWFKKGGRRKKKSEGIRAAGVMLCKWGVYFGKPPVAPNQRTSSETRSA  
ARQNFRRGGSRAARSSRLPSRGTARNRNLGSGSCSNTNHSVLPQRSLHVE  
GALHEQEQEWLSCRGGPAAATVIPAKAQ\$ADGDFMDTSM\$DLCYTLGSHT\$E  
ASSDLSRENS\$SQKKYRVSWSKGLSAGKCTFMVPERHRVTQLGFHNWPTVT  
ASVCRHIVPGCSRTARSRVVHHPCLTKPNPHHLSGGTMGLKPKQGKEVG  
PSLLYSKLWPHFRLFSGTKGPSTWQMKITILCIVGMLEGPRASRYQTGKM  
QSKGSAQGW\$MCKWQ\$SQSPNTEMANCLPSLPPDRMKESEK\$GWSA

>Ame\_R020040

MRLLSAVPGGLLSAATLR\$AAQPQ\$GSPCGVDSNFWGGLHNYLMTETEC  
HWILEFPSSLPVLVKDTLQMASQQGSEPLLQLYFHNLEQGVVAVIILV  
QATTVMQAMAVRSRLHASSGLAQSLISILRTTDTQTSAPVARKTAVANSI  
DRTSKGQIKNIVPQISPTSAYGSLQLSFHDQIAATIHNIFGGVGAQSSPG  
PTTVAHLGFTWAPLSSGLCQLQGLSSPSSFMLQTF
